1 **Viral burdens are associated with age and viral variant in a population-**  
2 **representative study of SARS-CoV-2 that accounts for time-since-infection**  
3 **related sampling bias.**

4  
5  
6 Helen R. Fryer<sup>1</sup>, Tanya Golubchik<sup>1</sup>, Matthew Hall<sup>1</sup>, Christophe Fraser<sup>1</sup>, Robert Hinch<sup>1</sup>, Luca  
7 Ferretti<sup>1</sup>, Laura Thomson<sup>1</sup>, Anel Nurtay<sup>1</sup>, Lorenzo Pellis<sup>2,3</sup>, George MackIntyre-Cockett<sup>4</sup>,  
8 Amy Trebes<sup>4</sup>, David Buck<sup>4</sup>, Paolo Piazza<sup>4</sup>, Angela Green<sup>4</sup>, Lorne J Lonie<sup>4</sup>, Darren Smith<sup>5</sup>,  
9 Matthew Bashton<sup>5</sup>, Matthew Crown<sup>5</sup>, Andrew Nelson<sup>6</sup>, Clare M. McCann<sup>6</sup>, Adnan  
10 Mohammed Tariq<sup>6</sup>, Rui Nunes Dos Santos<sup>6</sup>, Zack Richards<sup>6</sup>. The COVID-19 Genomics UK  
11 (COG-UK) consortium<sup>7\*</sup>, David Bonsall<sup>1</sup> & Katrina A. Lythgoe<sup>1</sup>

12  
13 <sup>1</sup>Big Data Institute, Nuffield Department of Medicine, University of Oxford, Old Road  
14 Campus, Oxford OX3 7FL, UK.

15  
16 <sup>2</sup>Department of Mathematics, University of Manchester, Manchester, UK.

17  
18 <sup>3</sup>The Alan Turing Institute, London, UK

19  
20 <sup>4</sup>Wellcome Centre for Human Genetics, Roosevelt Drive, Oxford, OX37BN, UK.

21  
22 <sup>5</sup>The Hub for Biotechnology in the Built Environment, Department of Applied Sciences,  
23 Faculty of Health and Life Sciences, Northumbria University, Newcastle upon Tyne NE1  
24 8ST, UK

25 <sup>6</sup>Department of Applied Sciences, Faculty of Health and Life Sciences, Northumbria  
26 University, Newcastle upon Tyne NE1 8ST, UK

27 <sup>7</sup><https://www.cogconsortium.uk>

28 \*Full list of consortium names and affiliations are in the appendix.

29  
30  
31 Corresponding author: Helen Fryer. [helen.fryer@bdi.ox.ac.uk](mailto:helen.fryer@bdi.ox.ac.uk)  
32  
33  
34

## 35 Abstract

36 In this study, we evaluated the impact of viral variant, in addition to other variables, on  
37 within-host viral burdens, by analysing cycle threshold (Ct) values derived from nose and  
38 throat swabs, collected as part of the UK COVID-19 Infection Survey. Because viral burden  
39 distributions determined from community survey data can be biased due to the impact of  
40 variant epidemiology on the time-since-infection of samples, we developed a method to  
41 explicitly adjust observed Ct value distributions to account for the expected bias. Analysing  
42 the adjusted Ct values using partial least squares regression, we found that among  
43 unvaccinated individuals with no known prior infection, the average Ct value was 0.94 lower  
44 among Alpha variant infections, compared those with the predecessor strain, B.1.177.  
45 However, among vaccinated individuals, it was 0.34 lower among Delta variant infections,  
46 compared to those with the Alpha variant. In addition, the average Ct value decreased by 0.20  
47 for every 10 year age increment of the infected individual. In summary, within-host viral  
48 burdens are associated with age, in addition to the interplay of vaccination status and viral  
49 variant.

## 50 Introduction

51 The SARS-CoV-2 epidemic in the United Kingdom (UK) has been characterised by the  
52 appearance of a series of distinct viral variants that, in order of emergence, include the  
53 B.1.177 lineage, and the Alpha (B.1.1.7 lineage), Delta (B.1.617.2 lineage) and Omicron  
54 (BA.1, BA.2, BA.4 and BA.5 lineages) variants. Explaining their successive abilities to  
55 spread, the Alpha, Delta and Omicron variants have been estimated to have a transmission  
56 advantage of 43-100% [1-3], 60-70% [4] and 52% [5] compared to their preceding variant.  
57 The underlying causes of these differences are unclear, but could include differences in  
58 within-host viral burdens [6], infectious periods, or the per-virion probability of between-host  
59 transmission. In turn, these could be influenced by many factors [7], including changes in  
60 virus attachment to human cells and the continuous interplay of population acquisition of  
61 immunity and the emergence of immune escape variants [8, 9]. In this study, we compare  
62 within-host viral burdens of different viral variants by analysing nose and throat swabs  
63 collected as part of the UK's nationally representative SARS-CoV-2 surveillance study [10,  
64 11].

65  
66 A number of studies have compared viral burdens between the Alpha variant and predecessor  
67 variants (Supplementary Table 1)[12-18] with mixed findings. For example, two detailed  
68 longitudinal surveys of a small number of infected individuals have suggested that viral  
69 burdens are similar among the variants [16, 17]. However, a much larger, but less intensive  
70 study of viral burdens at symptom onset has identified higher viral burdens among  
71 individuals infected with the Alpha variant, compared to those with a predecessor lineage  
72 [15]. The impact of later variants on viral burdens has also been studied [11, 15, 16, 19],  
73 indicating higher viral burdens associated with the Delta variant compared to the Alpha  
74 variant, among vaccinated individuals [11] in one survey, but no difference in viral burdens  
75 among these variants in another [16]. The study design and cohorts used to investigate viral  
76 burdens have varied and this may explain the different findings. In addition to the differences  
77 in sample sizes and sampling frequency, the study populations have varied. Some have been  
78 based upon testing symptomatic individuals or their close contacts [12, 14, 15] and have  
79 thereby excluded some asymptotically infected individuals, who make up an estimated  
80 40% [20] of infections. Others have focussed on a specific group of people, with examples  
81 being hospitalized individuals [12] and persons associated with a professional sporting league

82 [16]. Methods to identify variants have also varied, with some surveys using Spike gene  
83 target failure (SGTF) [12, 14, 15] during PCR testing or sample date [11] to classify the viral  
84 variants, whereas other have used whole genome sequencing [13, 16, 17].

85  
86 The Office for National Statistics (ONS) COVID-19 Infection Survey (CIS) is a large  
87 household-based surveillance study based in the United Kingdom [10, 11]. We analysed data  
88 from the CIS to investigate the impact of viral variant on viral burdens. The survey randomly  
89 selects private households on a continuous basis from address lists and previous surveys to  
90 provide a representative UK sample. Individuals were asked to provide information that  
91 included demographics, symptoms, and vaccination details. As part of the survey, nose and  
92 throat swabs were collected and tested for SARS-CoV-2 using RT-PCR, and, if positive,  
93 individuals with a cycle threshold (Ct) less than 30 were sequenced using whole genome  
94 sequencing. Since the Ct value of a sample is inversely correlated with  $\log_{10}(\text{viral burden})$  of  
95 that sample [21], this study design enables viral burdens to be investigated. Although the  
96 accuracy with which sampled viral burdens from nose and throat swabs informs viral burdens  
97 occurring throughout the body is unclear [22], this study does allow for investigation into  
98 viral burdens in a manner that avoids biases associated with samples from symptomatic  
99 individuals or small studies of particular demographic groups.

100  
101 The survey is simultaneously a cross sectional survey of the population through time and a  
102 longitudinal survey of individuals, with individuals sampled approximately weekly during the  
103 first month following enrolment and then monthly thereafter. This weekly or monthly  
104 sampling leads to uncertainty in the time-since-infection of positive samples. In addition, the  
105 different epidemiological trajectories of the variants mean that the distribution of time-since-  
106 infection for each variant at any given time can be skewed depending on when the samples  
107 were collected. For example, if a variant is increasing in prevalence, a cross sectional sample  
108 will contain more individuals with that variant who are earlier on in their infection compared  
109 those who are later on in their infection[23]. Because within-host viral burden trajectories are  
110 asymmetric, with the peak in viral load closer to the start of infection than to the end [16],  
111 this can affect the sampled distribution of viral burdens and complicate comparisons between  
112 viral variants. The impact of SARS-CoV-2 epidemiology on sampled Ct values is sufficiently  
113 strong for its shifts to be inferred from changes in Ct values measured over time [23, 24].

114  
115 We are unaware of any published studies comparing viral burdens associated with viral  
116 variants from a large population-representative surveillance survey that directly estimates the  
117 impact of variant-specific epidemiological trajectories. Here, we address this gap by  
118 developing a methodology that directly estimates the combined impact of variant-specific  
119 within-host viral burden and epidemiological trajectories on randomly sampled viral burdens.  
120 We apply this methodology to data from the CIS to investigate the impact of a range of  
121 factors, including variant, vaccination status, and age, on viral burdens, as measured by Ct  
122 values. As many countries move towards implementing SARS-CoV-2 surveillance surveys,  
123 the concepts and methodologies described here will be valuable for informing public health  
124 decisions.

125

## 126 **Results**

127 We analysed RT-qPCR SARS-CoV-2 positive samples from the CIS that were sequenced at  
128 Oxford (sampled between 27/09/20 and 17/06/21) or Northumbria (sampled between  
129 20/09/21 and 19/01/22) and had a  $Ct \leq 30$ . These samples cover the period of the epidemic that  
130 includes part of the B.1.177 wave, the full Alpha wave, part of the Delta wave, and part of the

131 BA.1 Omicron wave. The lineages of sampled sequences were identified from sequence data  
132 (see methods for details) and only the samples that could be classified as either B.1.177, or  
133 the Alpha, Delta or BA.1 (Omicron) variants of concern (VoCs) were analysed. Of a total  
134 10586 and 24232 sequences obtained from samples sent to Oxford and Northumbria in which  
135 a lineage could be assigned, 3256 (31%) and 477(2%) respectively were not from these  
136 lineages and were excluded from further analysis.

137

## 138 **A framework to infer epidemiologically adjusted Ct values**

139

140 To enable us to compare viral burdens between different viral variants, we developed a  
141 framework that adjusts observed Ct values to account for the different epidemiological  
142 trajectories of different viral variants (see methods). In brief, variant-specific incidence rates  
143 for each of the major variants in the sample data (B.1.177, Alpha, Delta and BA.1 Omicron)  
144 (Figure 1a) were inferred by combining estimates of total SARS-CoV-2 incidence rates in  
145 England

146 ([www.ons.gov.uk/peoplepopulationandcommunity/healthandsocialcare/conditionsanddiseases/datasets/coronaviruscovid19infectionsurveydata](http://www.ons.gov.uk/peoplepopulationandcommunity/healthandsocialcare/conditionsanddiseases/datasets/coronaviruscovid19infectionsurveydata)) with estimates of the proportion of  
147 incident infections with each variant, as inferred from the COVID-19 infection consortium  
148 data repository ([www.cogconsortium.uk/](http://www.cogconsortium.uk/)). These data were used rather than the equivalent  
149 estimates available directly from CIS to prevent the introduction of a time lag between  
150 incidence and prevalence into our study. The variant-specific incidence rates were combined  
151 with normally distributed infection periods to estimate how the expected distribution of time  
152 since infection from randomly sampled individuals changes over calendar time for each of  
153 the variants. For each PCR positive sequenced sample in our analysis, the expected  
154 distribution of the time since infection corresponding to its variant and sample date was  
155 identified and truncated to account for expected bounds, where these could be determined by  
156 previous positive or negative samples from the same individual.

158

159 For each sample, we next estimated an expected distribution of Ct values. This was achieved  
160 by assuming that within-host Ct values are described by a piecewise, valley-shaped trajectory  
161 (Figure 1b) with depth (viral burden peak) and width (infected period) taken from normal  
162 distributions. The timing of the valley trough (peak viral burden) was fixed at a chosen  
163 fraction across the width. The parameters describing these metrics were estimated from an  
164 alternative data source [16]. However, the mean maximum valley depth (mean peak viral  
165 burden) was iteratively inferred, and other parameters – including the timing of peak viral  
166 burden – were varied during sensitivity analyses. For each sample, an adjusted Ct value was  
167 then inferred by finding the percentile of the observed Ct value among the expected Ct  
168 distribution and selecting the Ct at the corresponding percentile in an expected Ct  
169 distribution, calculated from a flat epidemic trajectory (Figure 1c).

170

171

a)

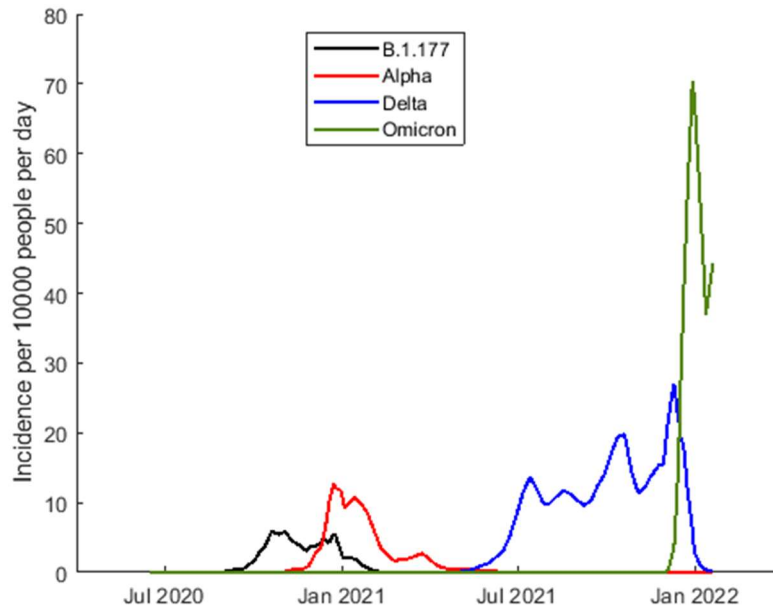

b)

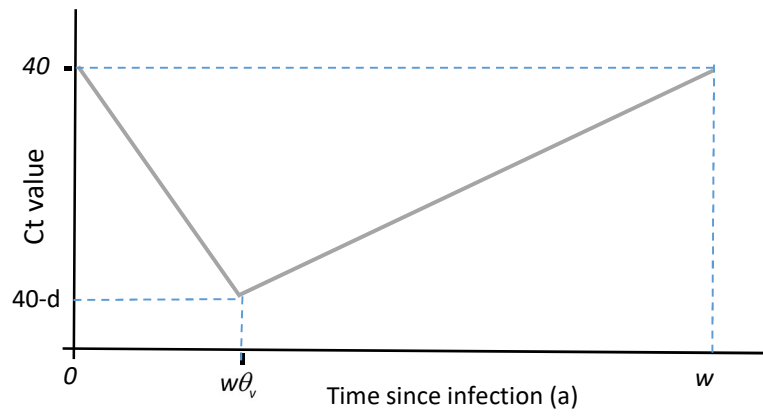

c)

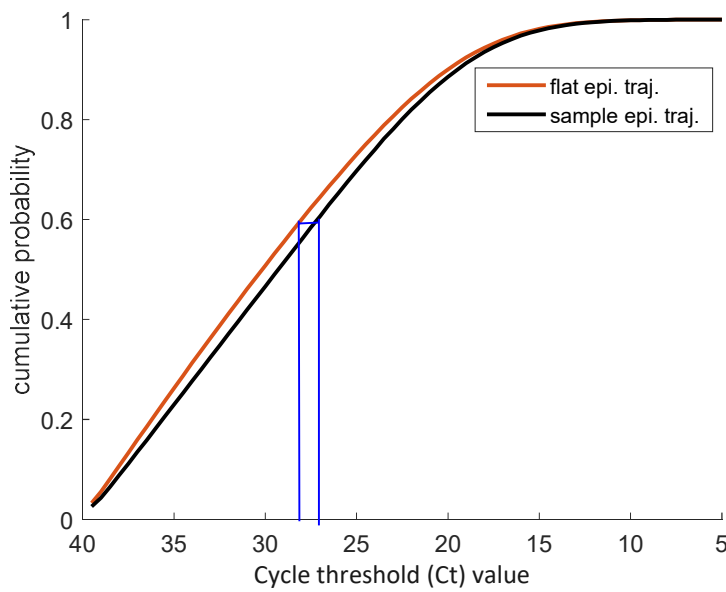

173 **Figure 1. A method for estimating epidemiologically adjusted Ct values.** a) Inferred daily incidence with the  
174 B.1.177 lineage and the Alpha, Delta and BA.1 Omicron variants between July 2020 and January 2022 in the  
175 UK. These were estimated to equal the product of the total daily incidence and the fraction of incident infections  
176 of that variant. b) Within-host Ct trajectories were assumed to be valley shaped, with infected period (width)  $w$ ,  
177 and depth  $d$ . The valley trough was estimated to be a fraction  $\theta_v$  across the width. c) Adjusted Ct values were  
178 inferred by first estimating the cumulative probability distribution of Ct values based upon the sample date and  
179 the known epidemiological trajectory of the sample variant and identifying the percentile at which the observed  
180 Ct value falls within this distribution. Second, the cumulative probability distribution of Ct values under an  
181 assumption of a flat epidemiological trajectory was estimated and the Ct value at the selected percentile was  
182 identified.

183

### 184 **Ct values from early and late during the Alpha wave are more closely aligned after** 185 **epidemiological adjustment**

186

187 Since we had data spanning the full epidemiological trajectory of the Alpha wave in the UK,  
188 we determined the impact of our method when applied to data collected at different stages  
189 during its trajectory. We applied the adjustment to Alpha-variant samples collected from  
190 individuals who were unvaccinated and had not been identified as being spike-antibody  
191 positive prior to infection (n=3413). By splitting the samples according to sample date into  
192 two equally sized sets (early-phase and late-phase) we visualised how the timing of sampling  
193 during the epidemiological trajectory impacted observed Ct values (Figure 2).

194

195 The median of the unadjusted Ct values was lower for early-phase samples than for late-  
196 phase samples (Figure 2a), consistent with the expected impact of the epidemiological effect.  
197 For each sample, our method estimates a probability distribution for the time since infection  
198 for that sample, based upon the sample variant, sample collection date, and, where available,  
199 the dates of recent positive and negative sample within the same infection. The mean time  
200 since infection derived from each of these distributions is plotted in Figure 2b. On average  
201 the mean time since infection is longer among the late-phase compared to early-phase  
202 samples. Because Ct values are, on average, lower in early infection compared to late  
203 infection (Figure 1b), the adjustment acted in the opposite direction and increased the Ct  
204 values of early-phase samples, but decreased the Ct values of late-phase samples (Figure 2c).

205

206 When the epidemiological adjustment was applied to the Ct values, the adjusted distribution  
207 of Ct values for the early-phase and late-phase were more closely aligned compared to the  
208 unadjusted values (Figure 2d). For comparison, the application of the method to data from the  
209 whole Alpha wave is also shown (middle column in Figure 2), revealing that the net  
210 adjustment applied to the full set of samples is negligible. This emphasises the value of using  
211 the epidemiological adjustment when samples are only available for part of the  
212 epidemiological trajectory of a variant, such as during the emergence phase of a new variant.

213

214

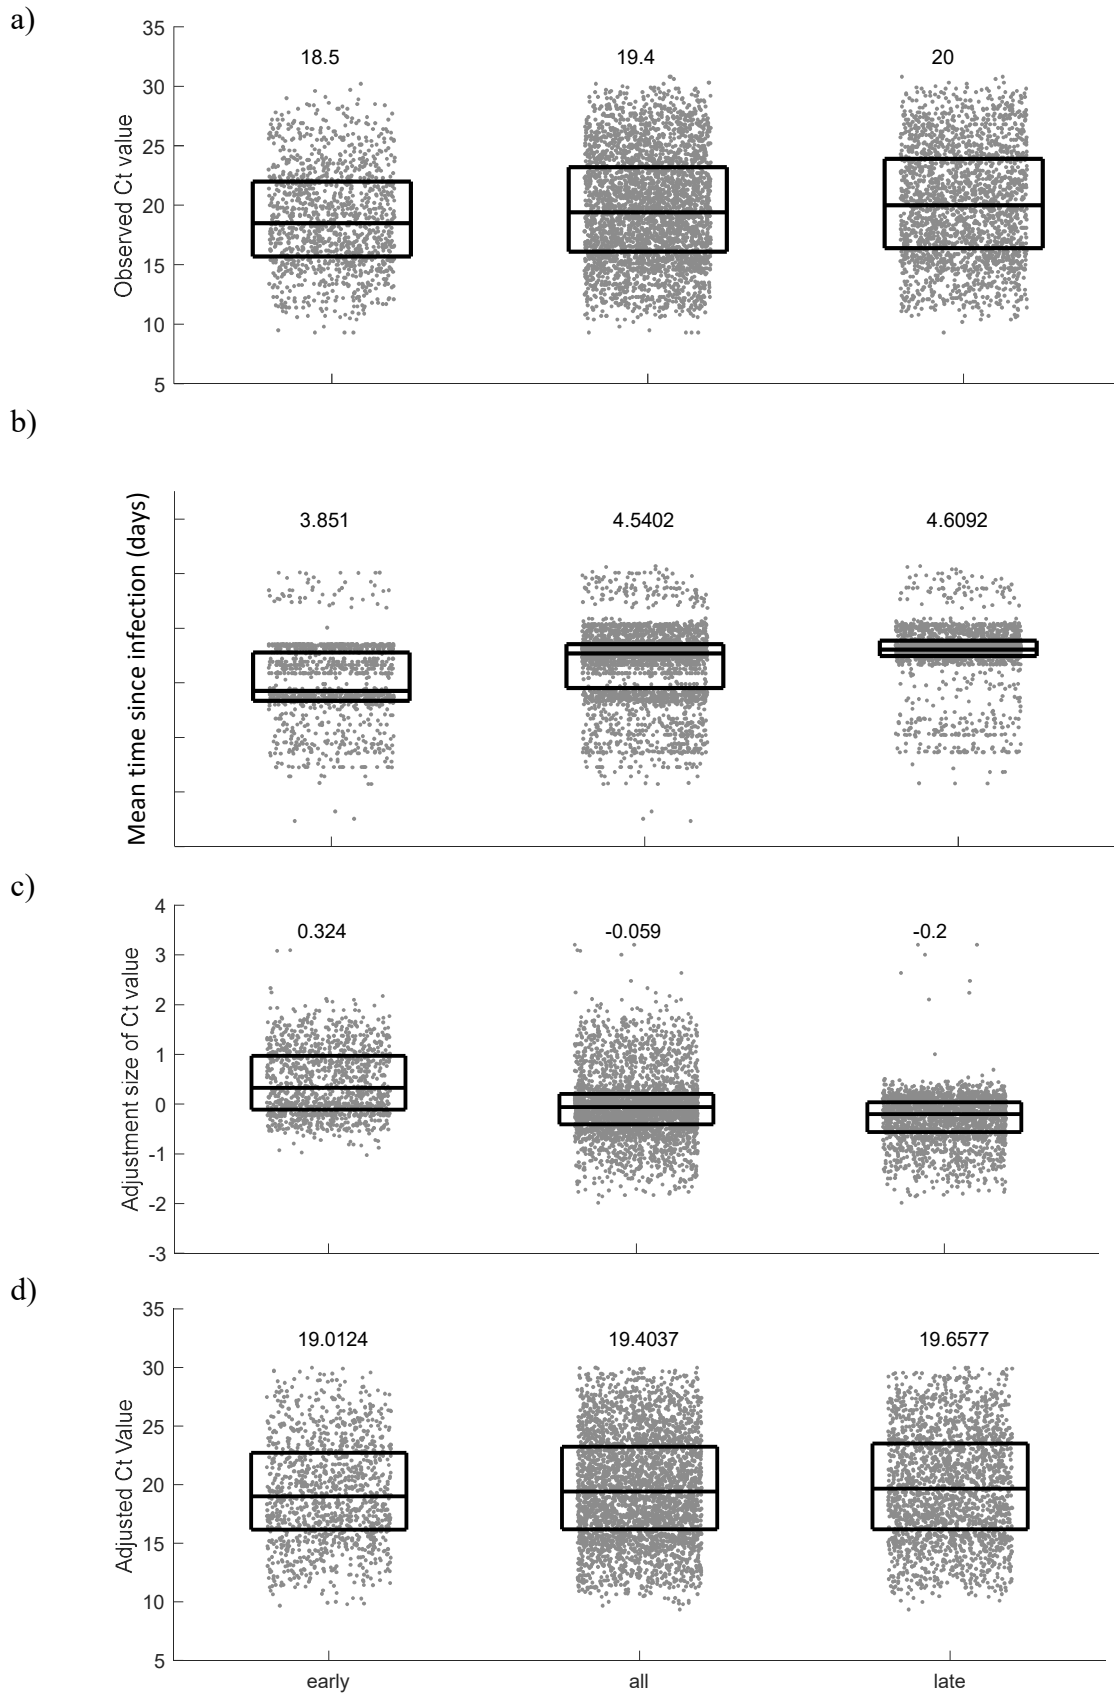

215 **Figure 2. Epidemiological adjustment results in more closely aligned estimates of mean viral burden from**  
216 **samples taken early and late during the Alpha wave. Samples that correspond to Alpha-variant infections in**  
217 **individuals who are unvaccinated and have not been identified as being antibody positive prior to infection are**  
218 **split according to sample date. Four metrics are applied to data from the early phase, all phases and the late**

219 phase. In each panel, median and interquartile ranges are overlaid onto individual data points. a) The observed  
220 Ct values are, on average, higher for late phase, compared to early phase samples. b) The estimated mean time  
221 since infection is, on average, longer for late-phase, compared to early-phase samples. c) The Ct adjustment size  
222 is, on average, positive for early phase samples, negative for late phase samples and negligible when all data are  
223 considered. d) On average, the adjusted Ct values relating to the early and late phase are more closely aligned  
224 than the observed Ct values. However, adjusted values remain, on average, higher in late-phase, compared to  
225 early-phase samples.

226

## 227 **The asymmetry of the within-host viral trajectory impacts comparisons**

228 Our framework highlights that the combined impact of the shape of the within-host viral  
229 trajectory and the epidemiological stage of a variant can affect viral burdens measured at the  
230 population level. Plausible changes to our assumption of the mean infected period have only  
231 a small impact upon the adjusted values (Figure 3a), whereas plausible changes to the  
232 fractional position of the viral burden peak across this period have a much bigger effect on  
233 the adjusted values (Figure 3b) (although absolute changes are still relatively modest  
234 compared with variability between individuals). The closer the peak viral burden is to the  
235 start of infection, the greater the epidemiological correction applied to samples selected from  
236 just early on or just late on during the Alpha wave. This can be understood by noting that in a  
237 random sample, early-phase samples have, on-average, shorter times since infection than late-  
238 phase samples and the greater the asymmetry of the within-host viral burden, the greater the  
239 difference in expected viral burdens between infections in the earlier or later phases of  
240 infection (Figure 3c).

241

242 In calculating the adjusted Ct values for samples with the Alpha variant (Figures 2d) we  
243 assumed that peak viral burden occurs at a fraction 0.3 across the infected period, based upon  
244 prior data from 103 individuals [16]. It is noteworthy that using this parameter estimate the  
245 median adjusted Ct value remains slightly higher for late-phase, compared to early-phase  
246 samples. This can be visualised by comparing the red and blues lines shown in Figure 3b at a  
247 value  $\theta_{\text{Alpha}}=0.3$  along the x-axis (grey dashed vertical line). By identifying the intersection of  
248 these two lines, it is possible to show that the median adjusted Ct values of the early-phase  
249 and late-phase samples are equal when the asymmetry of the within-host trajectory is  
250 increased, such that  $\theta_{\text{Alpha}}=0.18$  (black dashed vertical line). Arguably, changing this  
251 parameter estimate so that the peak is closer to the start of infection than we have assumed  
252 may provide a better estimate of its true value compared to the one that we derived from a  
253 prior study. However, there are other explanations for higher viral burdens (lower Ct values)  
254 in the early-phase samples. Because the CIS has not intensively sampled participants  
255 throughout the pandemic, but rather conducted a large round of recruitment in September-  
256 October 2020, meaning that many participants at the start of the Alpha wave were still  
257 undergoing more regular – approximately weekly – follow-up, they may genuinely have been  
258 sampled closer to the start of infection in the early phase than the later phase. Second, CIS  
259 tested antibodies in only ~15% participants prior to the Alpha wave, so we cannot rule out  
260 that some samples come from individuals who had had a prior infection and that the number  
261 of such individuals has increased over the duration of the Alpha wave. It is thus credible that  
262 more intensive sampling and lower population levels of immunity present earlier on in the  
263 Alpha wave could contribute to the pattern of lower adjusted Ct values in early-phase  
264 compared to late-phase samples.

265

266



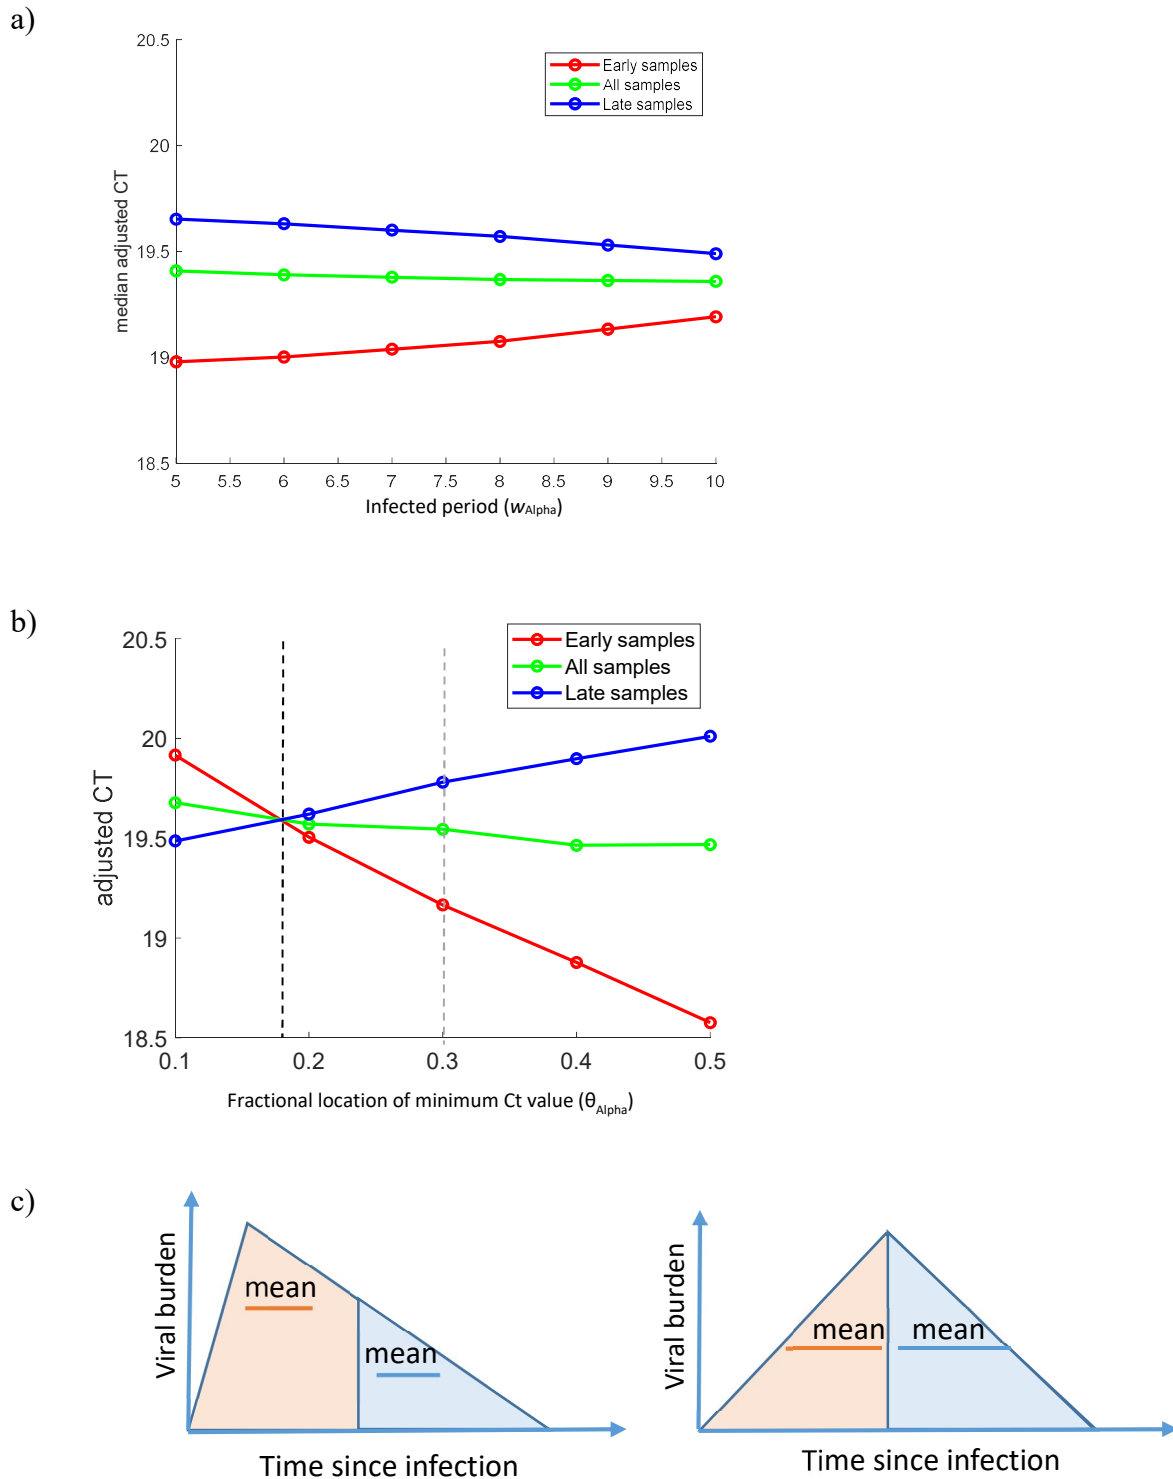

267 **Figure 3. The epidemiological stage and the asymmetry of the within-host viral trajectory impact the Ct**  
 268 **adjustment size.** In panels a) and b) samples that correspond to Alpha-variant infections in individuals who are  
 269 unvaccinated and have not been identified as being antibody positive prior to infection are split according to  
 270 sample date. The medians of the adjusted Ct values are plotted for early samples (red), late samples (blue) and  
 271 all samples (green) under different assumptions about the asymmetry and the mean width of the within-host  
 272 viral burden trajectory. In panel a) the infected period is varied under an assumption that the viral burden  
 273 trajectory is skewed towards the start of infection ( $\theta_{\text{Alpha}}=0.3$ ). This shows that Ct values are lower (viral  
 274 burdens are higher) amongst samples taken earlier on during infection, but vary to only a limited degree with  
 275 changes in the mean infected period ( $w_{\text{Alpha}}$ ). In panel b) the fractional location of the peak viral burden,  $\theta_{\text{Alpha}}$ , is  
 276 varied under the assumption that the mean infected period is 8 days ( $w_{\text{Alpha}}=8$ ). This shows that the asymmetry

277 of the within-host viral burden trajectory measurably impacts the adjusted Ct values and that the early and late-  
278 phase Alpha variant samples are most closely aligned when  $\theta_{\text{Alpha}}=0.18$ . Panel c) highlights how when the  
279 within-host trajectory is skewed towards earlier during infection, viral burdens sampled during early infection  
280 will on average be higher than those sampled later on in infection.

281

282

### 283 **Investigating factors associated with viral burdens**

284 We investigated whether factors, including viral variant, are associated with adjusted Ct  
285 values sampled in the CIS and sequenced at Oxford or Northumbria Universities using partial  
286 least squares regression (PLS). Samples sequenced at Oxford were collected between 27<sup>th</sup>  
287 September 2020 and 17<sup>th</sup> July 2021, and cover the period of the epidemic that includes part of  
288 the B.1.177 wave, the full Alpha and part of the Delta wave. Samples sequenced in  
289 Northumbria were collected between 20<sup>th</sup> September 2021 and 19<sup>th</sup> January 2022 and cover  
290 part of the Delta wave and part of the BA.1 Omicron wave. We have analysed the samples  
291 sequenced from the two centres separately so that differences in sequencing protocols and  
292 inclusion criteria do not affect our results.

293 Adjusted Ct values for samples from these two centres are shown in Figure 4, categorised  
294 according to sample date (Figure 4a and 4d), participant age (Figure 4b and 4e), and a  
295 combination of prior exposure category and variant (Figure 4c and 4f). Using partial least  
296 squares regression analysis, we assess the impact of sample date, sex, first vaccine dose  
297 product (AstraZeneca, Pfizer) and prior exposure category (no known prior exposure, prior  
298 exposure without vaccination, 1 vaccine dose, 2 vaccine doses, 3 vaccine doses) on adjusted  
299 Ct values. In addition, within each prior exposure we assess the impact of variant (B.1.177,  
300 Alpha, Delta and BA.1 Omicron).

301

302

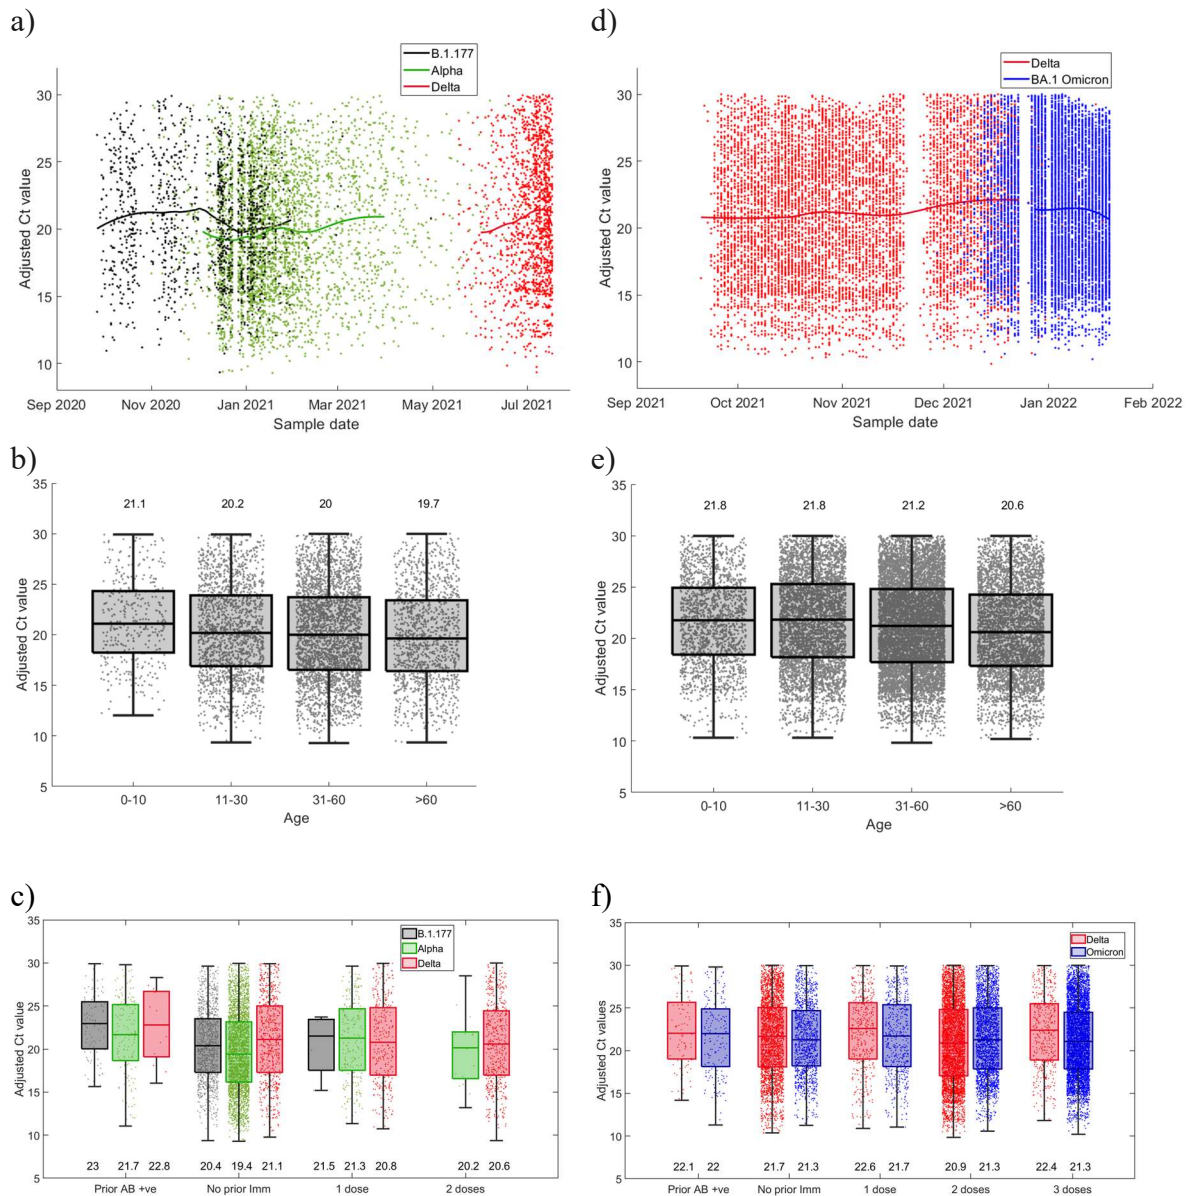

303

304

305

306 **Figure 4. Adjusted Ct values plotted against different factors**

307 For samples sequenced at Oxford (a, b and c) and at Northumbria (d, e and f), adjusted Ct values are plotted  
 308 against different factors. Panel a) and d) show a LOESS fit (smoothing parameter=0.55) of adjusted Ct values  
 309 over sample date, categorised by variant. Panels b) and e) show box and whisker plots of adjusted Ct values by  
 310 age category. Panels c) and f) show box and whisker plots of adjusted Ct values by prior vaccination and/or  
 311 infection, by variant. Horizontal lines represent the median and interquartile range. Parameter values used in  
 312 these calculations are listed in table 3.

313

314 Prior to application of the PLS regression model, we investigated multicollinearity among  
315 predictor variables, by calculating variance inflation factor (VIF) values (supplementary table  
316 2). A  $VIF > 3$  can be considered an indicator of moderate multicollinearity and a  $VIF > 5$  an  
317 indicator of strong multicollinearity. Among the Oxford samples, we found that sample date  
318 was highly multicollinear with other predictors ( $VIF 7.5$ ). This is intuitively clear from the  
319 strong temporal separation of samples with the Alpha and Delta variants, as observed in  
320 Figure 4a. Because we wanted to assess the potential impact of variant, and since it is not  
321 possible to independently assess the effect of sample date and variant, we removed sample  
322 date from the regression model of the Oxford samples. In the interpretation of the subsequent  
323 analysis, it is therefore important to recognise that factors that have not explicitly been  
324 included in the regression, but correlate with calendar time, cannot be ruled out as being  
325 predictive of viral burdens. For the Northumbria samples, although the sample date VIF value  
326 of 3.4 indicates only a moderate degree of collinearity, for consistency we similarly removed  
327 sample date from the regression.

328 Because several of the VIF values for other predictor variables among both sample sets were  
329 greater than 3, we analysed our data using PLS regression to acknowledge the difficulties in  
330 disentangling the relative roles of different factors in explaining viral burdens.

331

### 332 **Viral burdens are higher among older individuals**

333 For samples sequenced in Oxford, six components (linear combinations of the predictors that  
334 are orthogonal to each other) describe the data (Supplementary Figure 1a), as determined by  
335 the number that minimises the mean squared prediction error. Although these components  
336 only explain a small amount of variance in the adjusted Ct values (2.1%), the first two are  
337 both significant in predicting the values in a quantile median regression model ( $p < 0.0001$  and  
338  $p = 0.003$ ) (used to acknowledge non-normality in the residuals). For the Northumbria  
339 samples, six latent components also minimise the mean squared prediction error, the first  
340 three of which significantly predict ( $p < 0.0001$ ) the adjusted Ct values (Supplementary Figure  
341 1a and 1b). This analysis highlights that, taken together, factors included in our model  
342 significantly impact viral burdens. For reference, loading plots for the first two latent  
343 components of each sample are shown in Supplementary Figures 1c and 1d.

344

345 Beta scores (which can be considered equivalent to regression coefficients), and variance in  
346 projection (VIP) scores can be used to assess the magnitude and importance of the  
347 contribution of the different variables to the response (Table 1), respectively. Variables with  
348 VIP values greater than 1 are typically considered to be important and those with VIP values  
349 greater than 0.8 are considered to be borderline important. Using this approach, we identified  
350 age as an important predictor of Ct values among both the Oxford (Beta score = -0.013 per  
351 year,  $VIP = 1.38$ ) and Northumbria (Beta score = -0.026 per year,  $VIP = 2.15$ ) samples. The  
352 effect that we measure equates to the mean Ct value being on average (across both datasets)  
353 0.20 lower for every 10 years older.

354

355 There was no evidence of an association between sex and viral burden among either the  
356 Oxford (Beta score = -0.13,  $VIP = 0.35$ ) or Northumbria samples (Beta score = -0.13,  $VIP = 0.63$ ),  
357 with only slightly lower Ct values (higher viral burdens) in males compared to females.

358

### 359 **Among individuals with no known exposure, viral burdens are higher during Alpha 360 compared to B.1.177 infection.**

361

362 We defined unvaccinated individuals with no known prior exposure as those individuals who  
363 have had neither a previous recorded infection, a previous positive test for spike antibodies,  
364 nor a vaccine at least 14 days prior. For samples sequenced at Oxford, Ct values in this group  
365 were higher for B.1.177 samples (Beta score=0.94, VIP=1.42) compared to Alpha. Since this  
366 difference in Ct values is in the opposite direction to that expected from increasing immunity  
367 over time, it is credible to infer that infection by the Alpha variant directly resulted in higher  
368 within-host viral burdens compared to infection with B.1.177.

369  
370 Among unvaccinated individuals with no known prior exposure sampled at Oxford, we also  
371 found strong importance in support of Ct values being higher in Delta infected individuals  
372 (Beta score=1.06, VIP=1.52) than Alpha infected individuals. However, it is not possible to  
373 determine whether this difference is caused by infection by the different variants, or other  
374 factors that also correlate with calendar time. In particular, infection-acquired immunity has  
375 been increasing in the population over time, and we cannot rule out increased immunity over  
376 time, rather than the shift from the Alpha variant to the Delta variant, explaining the  
377 measured difference.

378 Among individuals with no known prior exposure whose samples were sequenced at  
379 Northumbria, there was no evidence of a difference in Ct values between BA.1 Omicron and  
380 Delta (Beta score=-0.14, VIP=0.60).

381

### 382 **Among vaccinated individuals, viral burdens are higher during Delta compared to** 383 **Alpha infection.**

384

385 For individuals who were vaccinated or had a known prior exposure, we further categorised  
386 them according to whether they had either tested positive for spike antibodies prior to the first  
387 PCR-positive sample in the infection, or had 1 vaccine dose, 2 vaccine doses, or 3 vaccine  
388 doses. Individuals who had both a prior antibody positive sample and were vaccinated were  
389 assigned to the appropriate vaccination group (1, 2 or 3 doses). Among the Oxford samples,  
390 Ct values were higher among vaccinated individuals, compared to those with no known prior  
391 exposure (Beta score=1.42, VIP=1.33). Though the magnitude and importance of the signal  
392 was weaker, a similar pattern was observed among the Northumbria samples (Beta  
393 score=0.47, VIP=0.88). The impact of two vaccine doses over one on Ct values was limited  
394 (Oxford samples: Beta score=0.01, VIP=0.75; Northumbria samples: Beta score=0.05,  
395 VIP=0.82), but the impact of variant among vaccinated individuals was important. Ct values  
396 were lower among Delta compared to Alpha infections (Oxford samples: Beta score=-0.34,  
397 VIP=1.02) and, although less significant, also lower among BA.1 Omicron infections,  
398 compared to Delta infections (Northumbria samples: Beta score=-0.15, VIP=0.88).  
399 Vaccination with AstraZeneca was associated with slightly higher viral burdens compared to  
400 Pfizer (Oxford samples: Beta score=-0.09, VIP=1.02; Northumbria samples: Beta score=-  
401 0.09, VIP=1.00).

402

403 There was an effect of lower higher Ct values among individuals with a prior antibody  
404 positive sample (compared to those with no known prior exposure); however, the importance  
405 of this factor was low (Oxford samples: Beta score=3.29, VIP=0.42; Northumbria samples:  
406 Beta score=0.33, VIP=0.24), as was the impact of variant in this group.

407

408

409  
410  
411

| Samples                                                                                         | Oxford     |      | Northumbria |      |
|-------------------------------------------------------------------------------------------------|------------|------|-------------|------|
| Result                                                                                          | Beta score | VIP  | Beta score  | VIP  |
| <i>Included in Model</i>                                                                        |            |      |             |      |
| <b>Age (in years)</b>                                                                           | -0.013     | 1.38 | -0.026      | 2.15 |
| <b>Prior immunity</b><br><i>Ref = AB -ve and unvaccinated</i>                                   |            |      |             |      |
| AB +ve                                                                                          | 3.29       | 0.42 | 0.33        | 0.24 |
| Vaccinated                                                                                      | 1.42       | 1.33 | 0.47        | 0.88 |
| <b>Variant (in AB -ve and unvaccinated)</b><br><i>Ref = Alpha (Oxford), Delta (Northumbria)</i> |            |      |             |      |
| B.1.177                                                                                         | 0.94       | 1.42 |             |      |
| Delta                                                                                           | 1.06       | 1.52 |             |      |
| BA.1 Omicron                                                                                    |            |      | -0.14       | 0.60 |
| <b>Variant (in AB+ve)</b><br><i>Ref = Alpha (Oxford), Delta (Northumbria)</i>                   |            |      |             |      |
| B.1.177                                                                                         | 0.78       | 0.35 |             |      |
| Delta                                                                                           | -2.91      | 0.22 |             |      |
| BA.1 Omicron                                                                                    |            |      | -0.07       | 0.23 |
| <b>Variant (in vaccinated)</b><br><i>Ref = Alpha (Oxford), Delta (Northumbria)</i>              |            |      |             |      |
| B.1.177                                                                                         | -0.31      | 0.05 |             |      |
| Delta                                                                                           | -0.34      | 1.02 |             |      |
| BA.1 Omicron                                                                                    |            |      | -0.15       | 0.88 |
| <b>Vaccine dose in vaccinated</b><br><i>Ref = 1 dose</i>                                        |            |      |             |      |
| 2 doses                                                                                         | 0.01       | 0.75 | 0.05        | 0.82 |
| 3 doses                                                                                         |            |      | 0.51        | 0.81 |
| <b>Vaccine product</b><br><i>Ref = Pfizer</i>                                                   |            |      |             |      |
| <i>AstraZeneca</i>                                                                              | -0.09      | 1.02 | -0.09       | 1.00 |
| <i>Not included in model</i>                                                                    |            |      |             |      |
| <b>Sex</b><br><i>Ref = Female</i>                                                               |            |      |             |      |
| Male                                                                                            | -0.13      | 0.35 | -0.13       | 0.63 |

412 **Table 1. Beta scores and variance in projection (VIP) values for the partial least squares**  
413 **analysis of samples sequenced in Oxford and Northumbria.**

414

415 **Higher viral burden in Alpha infections is robust to assumptions about the within-host**  
416 **viral trajectory**

417

418 Given our previous observation that the assumed asymmetry in the viral load trajectory can  
419 have a measurable impact on the adjusted Ct value, we conducted a sensitivity analysis on  
420 our PLS regression. We varied the parameter that determines the asymmetry of the within-  
421 host viral burden trajectory for each of the variants. Both the Beta score (Figure 5a) and VIP  
422 value (Figure 5b) the for the indicator for the variant being B.1.177 rather than Alpha among  
423 individuals sampled at Oxford with no known prior exposure (i.e. no known prior infection,  
424 prior antibodies or vaccination) decreased as the assumed viral burden trajectories of B.1.177  
425 were more skewed towards the start of the infection compared to Alpha (Figures 5a and 5b).  
426 These relationships are linked to the fact that although the Oxford samples span the whole of  
427 the Alpha wave, they did not span the early part of the B.1.177 wave. It is noteworthy that the  
428 VIP value remained greater than unity across plausible parameter combinations, providing  
429 support for the conclusion that viral burdens are higher in samples with the Alpha variant  
430 compared to B.1.177, among these individuals.

431 When evaluating the impact on Ct values of the variant being Delta (rather than Alpha)  
432 among vaccinated individuals (Figures 5c and 5d), both the VIP value and the magnitude of  
433 the Beta score increased as the assumed viral burdens of Delta were more skewed towards the  
434 start of the infection compared to Alpha. These relationships are linked to the fact that that  
435 the Oxford samples did not span the latter part of the Delta wave. The VIP value remained  
436 greater than unity (or very close to for higher discordant within-host trajectories of the two  
437 variants) across plausible parameter combinations. This analysis therefore provides support  
438 for the finding that samples with the Delta variant had lower viral burdens compared to  
439 samples with the Alpha variant among vaccinated individuals.

440

441

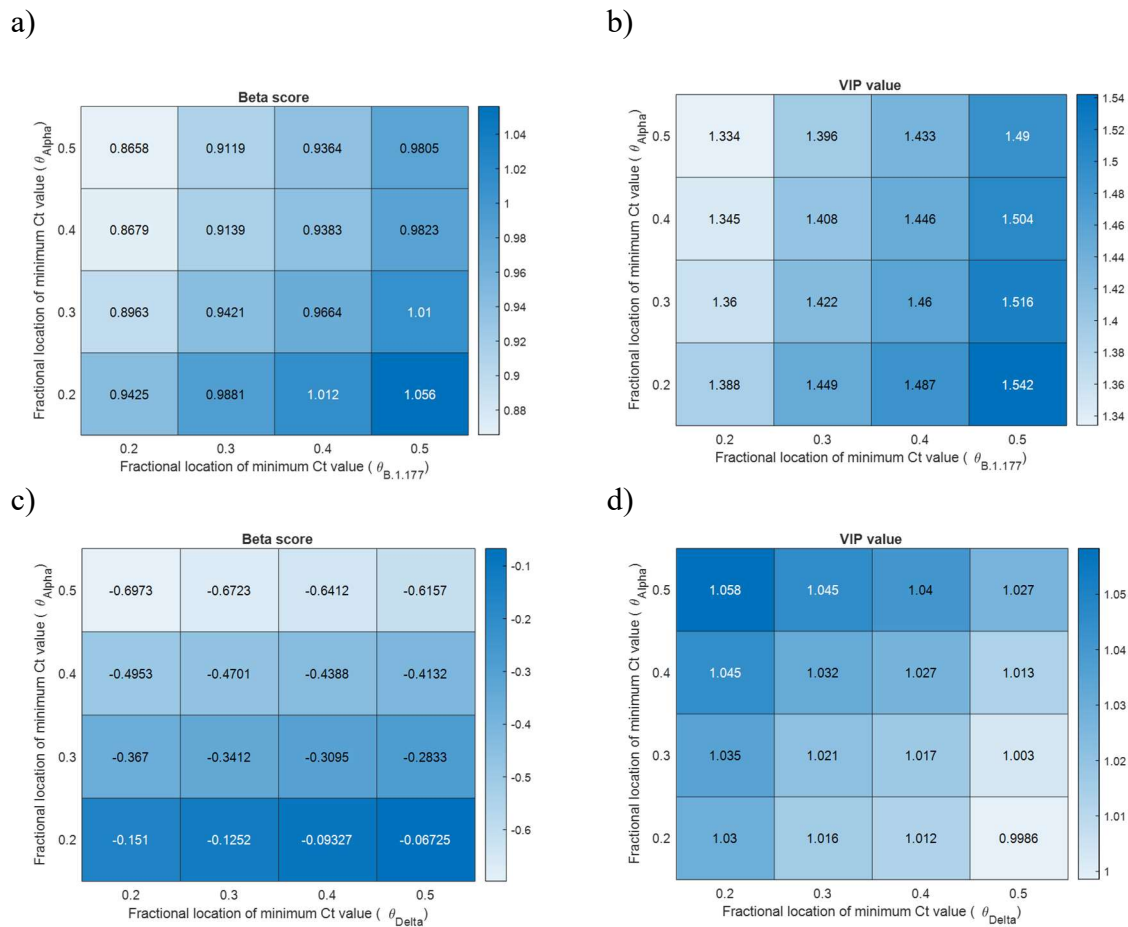

442

443

**Figure 5. Sensitivity analysis investigating the impact of the shape of within-host viral trajectory on PLS regression analysis into the impact of variant on Ct values**

444

445

446

447

448

449

450

451

452

453

454

455

456

457

Panels a) and c) show Beta scores, which can be considered to be equivalent to regression coefficients, defining the magnitude of the effect of the variant on the adjusted Ct values. Panels b) and d) show VIP values defining the importance of the association – where values greater than 1 are typically considered to indicate importance. Panels a) and b) investigate the association between the variant being B.1.177 (relative to Alpha) and Ct values among individuals with no known prior immunity. The Beta scores and VIP values vary with changes to the assumed asymmetry of the within-host viral burden trajectory associated with the B.1.177 lineage and the Alpha variant. The asymmetry is determined by changes to the fractional location of the minimum Ct value (peak viral burden) for each variant ( $\theta_{B.1.177}$  and  $\theta_{Alpha}$ , respectively). Data sampled at Oxford. Panels c) and d) investigate the association between the variant being Delta (relative to Alpha) and Ct values among vaccinated individuals and how the Beta scores and VIP values vary with changes to  $\theta_{Alpha}$  and  $\theta_{Delta}$ , respectively. Data sampled at Oxford.

## 458 Discussion

459

460

461

462

463

464

465

466

We developed a framework to compare within-host viral burdens across different SARS-CoV-2 variants from random survey data, such as the CIS. The method directly estimates the level of uncertainty in the time-since-infection of each sample due to the sparse nature of the sampling and the effect of differing epidemiological trends of SARS-CoV-2 variants. The method highlights how the combination of the within-host viral trajectory and the epidemiological trajectory of a viral variant can influence observed viral burdens in survey data.



467  
468 Using this framework, we inferred epidemiologically adjusted Ct values from samples  
469 sequenced as part of the CIS, a large-scale community survey, recruiting randomly selected  
470 private residential households and testing participants regardless of symptoms. Using partial  
471 least squares regression we found that viral burdens were higher among older individuals. In  
472 addition, among individuals with no known prior immunity, viral burdens were, on average,  
473 higher among Alpha-variant compared to B.1.177 samples. Viral burdens among individuals  
474 with no known prior exposure to infection or vaccination then decreased during the transition  
475 from primarily Alpha to primarily Delta infections. However, it is not possible to determine  
476 whether this was due to the infecting variant or other factors that also have a temporal  
477 component. For example, an increase in immunity due to unobserved infection over time  
478 could also explain this result. Among vaccinated individuals, we found evidence of higher  
479 viral burdens in infections with the Delta-variant, compared to those with the Alpha-variant.

480  
481 Our study supports the hypothesis that the observed increases in transmissibility from  
482 B.1.177 to the Alpha variant (in individuals with no known prior exposure to infection or  
483 vaccination) and then to the Delta variant (in vaccinated individuals) were, at least in part,  
484 due to higher viral burdens. However, we cannot rule out other factors playing a role,  
485 including differences between variants in the viral shedding rate, infectious period [25], or  
486 per-virion probability of transmission. Although we infer higher viral burdens among BA.1  
487 Omicron samples relative to Delta variant samples, our inferred support for this result is not  
488 strong. The replacement of the Delta variant with the BA.1 Omicron variant in the UK  
489 therefore cannot be clearly attributed to changes in viral burdens.

490  
491 For this study we determined viral variant from viral sequence data, which in practice meant  
492 excluding samples with low viral burdens. This is because only samples with  $Ct \leq 30$  are  
493 routinely sequenced, and additionally, samples with higher Ct values (lower viral burdens)  
494 are less likely to have sufficient genomic coverage to determine the variant. Although these  
495 restrictions could impact our qualitative estimates, we do not expect them to bias our main  
496 qualitative results. Furthermore, since individuals with low viral burdens contribute little to  
497 viral transmission [26], our study reflects the impact of viral variants and other factors on  
498 viral burdens at levels that are relevant for transmission.

499  
500 Monitoring of the characteristics of SARS-CoV-2 variants will continue to be critical to  
501 public health decisions in the foreseeable future. As more countries roll out population  
502 representative surveys, correcting for epidemiological effects will remain important. More  
503 generally, any studies using community surveillance data that aim to consider traits that vary  
504 through infection (e.g. Ct values, immune markers), could be impacted by pathogen  
505 epidemiology and therefore could benefit from epidemiological adjustment. In summary, our  
506 study promotes a new way of critically analysing random survey data to acknowledge the  
507 combined impact of pathogen epidemiology and within-host traits that vary over the course  
508 of an infection.

## 509 **Methods**

### 510 **Study cohort**

511  
512 We used data from the Office for National Statistics Covid infection survey  
513 (ISRCTN21086382CT, <https://www.ndm.ox.ac.uk/covid-19/covid-19-infection-survey>). The  
514 survey has been described in detail elsewhere [24]. However, in brief, private households  
515 were randomly selected on a continuing basis in order to provide a representative sample of  
516

517 inhabitants of the UK. Following agreement to participate, self-collected nose and throat  
518 swabs were taken by participants – or their parents/carers if under 12 years of age – as  
519 instructed by a study worker. The intended schedule of swabbing was weekly for the first  
520 month of participation and monthly thereafter, for up to a year. However, there was  
521 variability among participants due to missed or late swabs, and participants could also chose  
522 to participate only once, or only for the first month, rather than on an ongoing basis, and were  
523 also free to leave the study at any time. For a random 10–20% of households, participants 16  
524 years or older were invited to provide monthly venous blood samples for assays of anti-  
525 trimeric spike protein IgG. Metadata that includes age, sex, gender, postcode and vaccination  
526 details, were additionally recorded.

527

## 528 **Sequencing and lineage identification**

529 All swabs were tested for SARS-CoV-2 using RT-QPCR, and the cycle threshold (Ct) values  
530 of positive samples were recorded. A random selection of positive samples collected before  
531 mid-December 2020 were sequenced, and from mid-December 2020 onwards the ambition  
532 was to sequence all positive samples with  $Ct \leq 30$ . Sequenced samples collected between 27<sup>th</sup>  
533 Sep 2020 and 17<sup>th</sup> July 2021 were sequenced at the University of Oxford using veSEQ. This  
534 employs an RNASeq protocol based on a quantitative targeted enrichment strategy [27] and  
535 sequencing on the Illumina Novaseq platform. For a full description of the sequencing  
536 protocol see [27, 28]. Most sequenced samples collected between 20<sup>th</sup> Sep 2021 and 19<sup>th</sup> Jan  
537 2022 were sequenced at the University of Northumbria using the CoronaHiT [29] variant of  
538 the ARTIC protocol and Illumina Novaseq 550. Consensus sequences were produced using  
539 the *shiver* pipeline [30] and lineage assigned using the PangoLEARN [31].

540 All samples sequenced in Oxford with  $Ct \leq 30$  were retained for analysis, with the added  
541 restriction of  $\geq 50\%$  genome coverage required for samples sequenced in Northumbria.  
542 Lineages were assigned using the PangoLEARN [31], with samples assigned as B.1.177 (and  
543 sublineages), Alpha (B.1.1.7 and sublineages), Delta (B.1.617.2 and sublineages) and  
544 Omicron (BA.1 and sublineages) used for this analysis. For Oxford sequenced samples with  
545  $< 50\%$  coverage, and which could not be reliably assigned using PangoLEARN, we assigned  
546 one of the four major lineages if a consensus base was called at three or more lineage  
547 defining sites, and with more than two-thirds of these calls consistent with the lineage. To  
548 avoid differences in sequencing protocol influencing our analyses, samples sequenced in  
549 Oxford and Northumbria were analysed separately.

550

## 551 **Infection characteristics**

552 All individuals with at least one positive sample sequenced in Oxford or Northumbria, and with  
553 the virus assigned to one of the four major lineages as described above, were included in our  
554 analysis, and indexed  $i=1\dots n$ , where  $n$  is the number of individuals. If an individual was  
555 infected by more than one major lineage during the study period, these were designated with  
556 an infection number  $j$ , where  $j=1$  represents the first infection,  $j=2$  the second infection, and so  
557 on. Positive samples were assumed to be part of the same infection if they were of the same  
558 major variant and were in a continuous sequence of positive samples (i.e. no negative  
559 intermediate samples). The index  $k$  denotes the  $k$ th sample of the infection. In the case of a  
560 non-continuous sequence of positive samples of the same major lineage, any addition positive  
561 samples were excluded from our study. Infections which were of the same major lineage but

562 not in a continuous sequence of positive samples were excluded from the analysis. The list of  
 563 variables used to describe the data are given in Table 2.

564

| Variable         | Description                                                                                                 |
|------------------|-------------------------------------------------------------------------------------------------------------|
| $t_{ijk}$        | Sample date of the $k$ th sample of the $j$ th infection of the $i$ th individual                           |
| $\tilde{t}_{ij}$ | Sample date of the last negative before the first positive of the $j$ th infection of the $i$ th individual |
| $c_{ijk}$        | Observed Ct value of the $k$ th sample of the $j$ th infection of the $i$ th individual.                    |
| $v_{ij}$         | Major variant of the $j$ th infection of the $i$ th individual                                              |
| $\varphi_i$      | Sex of the $i$ th individual                                                                                |
| $e_i$            | Age group of the $i$ th individual                                                                          |
| $f_i$            | Vaccine product (AstraZeneca or Pfizer) of the first vaccine dose of the $i$ th individual                  |
| $h_i^r$          | Date of the $r$ th vaccine dose of the $i$ th individual                                                    |

565 **Table 2. Data used in the study**

566

### 567 **Calculating epidemiologically adjusted Ct values**

568

#### 569 ***Step 1. Describing the within-host Ct trajectory.***

570 We assume that within-host Ct trajectories are piecewise linear and valley-shaped (Figure  
 571 1b), defined by the infected period (width,  $w$ ) and the difference between the minimum Ct  
 572 value and 40 (depth,  $d$ ). Probability distributions for these variables (calculated in a discrete  
 573 manner, each spaced by value 0.25 and 0.5 respectively) are derived from truncated  
 574 discretised normal distributions, described by  $p(d)$  (equation 1) and  $p(w)$  (equation 2), with  
 575 means  $W_v^{mean}$  and  $D_v^{mean}$  and standard deviations,  $W^{SD}$ ,  $D^{SD}$ , so that

576

$$577 \quad p(d) = (\Phi_D(d) - \Phi_D(d - 0.5)) / (\Phi_D(5) - \Phi_D(32)) \quad \text{for } d = [5.5, 6.0, 6.5, \dots, 32] \quad (1)$$

$$578 \quad p(w) = (\Phi_W(w) - \Phi_W(w - 0.25)) / (\Phi_W(35) - \Phi_W(3)) \quad \text{for } w = [3.25, 3.50, 3.75, \dots, 35] \quad (2)$$

579 where

$$580 \quad \Phi_D(d) = \text{normalCDF}_{(D_v^{mean}, D^{SD})}(d) \quad (3)$$

581  $\Phi_w(w) = normalCDF_{(W_v^{mean}, W^{SD})}(w)$  (4)

582 The peak viral burden is assumed to occur at a time since infection equal to a fraction,  $\theta < 1$ , of  
583 the total infected period. The parameters  $W_v^{mean}$ ,  $W^{SD}$ ,  $D^{SD}$ , and  $\theta$  are derived from  
584 previous studies and varied in sensitivity analyses. The parameter  $D_v^{mean}$ , is iteratively  
585 inferred to a tolerance of 0.1 following implementation of the methodology described –  
586 which, for each sample, estimates an adjusted Ct value – and calculated to equal twice the  
587 difference between 40 and the mean adjusted Ct value for that variant. For ease of reference,  
588 all other variables described here and throughout the following derivation are listed in Table  
589 3.

590 ***Step 2. Estimating the distribution of time since infection for different SARS-CoV-2***  
591 ***variants over calendar time.***

592 We estimated the distribution of infections in the population stratified by variant and time  
593 since infection over calendar time using published estimates of total incidence of SARS-  
594 CoV-2 in the UK (  
595 [www.ons.gov.uk/peoplepopulationandcommunity/healthandsocialcare/conditionsanddiseases](http://www.ons.gov.uk/peoplepopulationandcommunity/healthandsocialcare/conditionsanddiseases/datasets/coronaviruscovid19infectionsurveydata)  
596 [/datasets/coronaviruscovid19infectionsurveydata](http://www.ons.gov.uk/peoplepopulationandcommunity/healthandsocialcare/conditionsanddiseases/datasets/coronaviruscovid19infectionsurveydata)) and published estimates of the proportion  
597 of incident infections with each of the major variants under study (B.1.177, Alpha, Delta and  
598 BA.1 Omicron) over time from the COVID-19 Genomics UK Consortium (COG-UK:  
599 [www.cogconsortium.uk](http://www.cogconsortium.uk)). Working in discrete time steps ( $\tau=1,2,3\dots$ ) that are 0.25 days each,  
600 we define  $I_\tau$  to be the incidence during time step,  $\tau$  and  $r_{\tau,v}$  to be the proportion of incident  
601 infections during time step  $\tau$  that are of variant  $v$  ( $v=1:4$  represent B.1.177, Alpha, Delta and  
602 BA.1 Omicron, respectively). We further define  $u_{a,\tau,v}$  to be the number of infections with  
603 time since infection,  $a$  (stratified as discrete time steps of 0.25 days each), during time step  $\tau$   
604 with variant  $v$ . The number of incident infections (i.e. infections with time since infection=0)  
605 during time step  $\tau$  with each variant  $v$  is estimated to be the product of the total incidence  
606 during that time step and the fraction of incident infections of that variant ( $u_{0,\tau,v} = r_{\tau,v} I_\tau$ ). To  
607 estimate  $u_{a,\tau,v}$  for each  $a > 0$ , we assume that the infected periods are taken from a truncated  
608 normal distribution with mean,  $W_v^{mean}$ , and variance  $W^{SD}$ . Therefore, the number of infections  
609 of time since infection  $a$ , at time step  $\tau$  is calculated to be the number of incident infections  
610 from time step  $\tau-a$  that are still persisting after a time  $a$ , thus:

611  $u_{a,\tau,v} = u_{0,\tau-a,v} (1 - normalCDF_{(W_v^{mean}, W^{SD})}(a))$ .

612

613 ***Step 3. For each sample and each infected period, estimate a time since infection***  
614 ***distribution.***

615 For each sample and for each assumed infected period ( $w$ ), we inferred the distribution of  
616 time since infection. We first selected the distribution (Step 2) that corresponds to the sample  
617 date and variant of the sample and adjusted it to account for known bounds on the time since  
618 infection for that sample, measured in days. The bounds ( $a_{ij}^{max} = 4(t_{ijk} - \tilde{t}_{ij})$  and

619  $a_{ij}^{min} = 4(t_{ijk} - t_{ij,k-1})$ ) are derived by considering information on Ct values at previous samples

620 and scaled to account for the transformation to discrete time steps. The time since infection  
621 probability distribution for each sample is then given by:

622

$$623 \quad p(a_{ijk} | w, t_{ijk}, v_{ij}) = \begin{cases} 0 & \text{if } a_{ijk} \begin{cases} > w & \text{or} \\ > a_{ij}^{\max} & \text{or} \\ < a_{ij}^{\min} \end{cases} \\ u_{a_{ijk}, 4t_{ijk}, v_{ij}} / \sum_{a=4a_{ij}^{\min}}^{4\min(a_{ij}^{\max}, w)} u_{a, 4t_{ijk}, v_{ij}} & \text{otherwise} \end{cases} \quad (6)$$

624

625 **Step 4. Infer a sample-specific expected distribution of Ct values.**

626 For each sample, based upon the sample time ( $t_{ijk}$ ) and variant ( $v_{ij}$ ), we derived an expected  
627 distribution of Ct values (equation 7). This was done by conditioning on the time since  
628 infection ( $a$ ) and the depth ( $d$ ) and width ( $w$ ) of the within host viral trajectory. These  
629 conditional probabilities were combined with the time since infection distributions derived in  
630 step 3 and the within-host parameter distributions described in step 1.

631

$$632 \quad p(C - 0.5 \leq c < C | t_{ijk}, v_{ij}) = \frac{\sum_{a_{ijk}} \sum_d \sum_w p(C - 0.5 \leq c < C | a_{ijk}, d, w) p(a_{ijk}, d, w | t_{ijk}, v_{ij})}{\sum_{c=0.5}^{40} \sum_{a_{ijk}} \sum_d \sum_w p(C - 0.5 \leq c < C | a_{ijk}, d, w) p(a_{ijk}, d, w | t_{ijk}, v_{ij})} \quad (7)$$

633

634

635 where the probability of a particular time since infection ( $a_{ijk}$ ), trajectory width ( $w$ ) and  
636 trajectory depth ( $d$ ) is given by:

637

$$638 \quad p(a_{ijk}, d, w | t_{ijk}, v_{ij}) = p(a_{ijk} | w, t_{ijk}, v_{ij}) p(d) p(w). \quad (8)$$

639

640 and the probability of the Ct value ( $c$ ) falling within a certain discrete boundary, given the  
641 time since infection and the width and depth of the viral trajectory, is defined as 1 or 0  
642 depending upon whether it matches up with the valley-shaped viral trajectory curve (figure  
643 1b), as shown below:

$$644 \quad p(C - 0.5 \leq c < C | a_{ijk}, w, d) = \begin{cases} 1 & \text{if } A_{d, w, \theta_v}(C - 0.5) < a_{ijk} < A_{d, w, \theta_v}(C) \text{ and } a_{ijk} \leq \theta w \\ 1 & \text{if } \tilde{A}_{d, w, \theta_v}(C - 0.5) < a_{ijk} < \tilde{A}_{d, w, \theta_v}(C) \text{ and } a_{ijk} > \theta w \\ 0 & \text{otherwise} \end{cases} \quad (9)$$

645

646 Where  $C$  is a dummy variable representing the Ct value, and

647

$$648 \quad A_{d,w,\theta_v}(C) = \frac{(40 - C)\theta_v w}{d} \quad (10)$$

649 and

$$650 \quad \tilde{A}_{d,w,\theta_v}(C) = w - \frac{(40 - C)(1 - \theta_v)w}{d} \quad (11)$$

651 are dummy variables that describe the relationship between the Ct value (C) and the time  
 652 since infection ( $A_{d,w,\theta_v}(C)$  and  $\tilde{A}_{d,w,\theta_v}(C)$ ), during down phase and up phase of the valley-  
 653 shaped trajectory, respectively.

654

655 **Step 5. Calculate an expected distribution of Ct values for a flat epidemic trajectory.**

656 The full process for calculating an expected distribution of Ct values (steps 1-4) was repeated  
 657 under an assumption of a flat epidemic trajectory, rather than a variant-specific trajectory.

658

659 **Step 6. For each sample, infer an epidemiologically adjusted Ct value.**

660 For each sample, we identified the percentile that the observed Ct ( $c_{ijk}$ ) falls in, among the  
 661 sample-specific expected Ct distribution. The adjusted Ct value ( $\tilde{c}_{ijk}$ ) was then derived by  
 662 identifying the Ct value at that percentile within the expected distribution of Ct values based  
 663 upon a flat epidemic trajectory (Figure 1c).

664

$$665 \quad \tilde{c}_{ijk} = F_{flat}^{-1}(F_{sample\ ijk}(c_{ijk})) \quad (12)$$

666 where

667

$$668 \quad F_{sample\ ijk}(\hat{C}) = p(\hat{c} < \hat{C} | sample\ ijk) = \sum_{C=5.5,6.0,\dots}^{\hat{C}} p(C - 0.5 \leq c < C | t_{ijk}, v_{ij}) \quad (13)$$

$$669 \quad F_{flat}(\hat{C}) = p(\hat{c} < \hat{C} | flat\ epidemic) = \sum_{C=5.5,6.0,\dots}^{\hat{C}} p(C - 0.5 \leq c < C | flat\ epidemic) \quad (14)$$

670

671

| Variable | Description                                                        |  |
|----------|--------------------------------------------------------------------|--|
| a        | Time since infection (discrete: each unit equivalent to 0.25 days) |  |
| d        | Minimum Ct -40 (viral trajectory depth)                            |  |
| w        | Infected period (viral trajectory width) (days)                    |  |

|                             |                                                                                                                                                 |                                                                                                |
|-----------------------------|-------------------------------------------------------------------------------------------------------------------------------------------------|------------------------------------------------------------------------------------------------|
| $\nu$                       | Variant                                                                                                                                         |                                                                                                |
| $\tau$                      | Time step (discrete: each unit equivalent to 0.25 days)                                                                                         |                                                                                                |
| $a_{ijk}$                   | Time since infection of the $k$ th sample of the $j$ th infection of the $i$ th individual (days) (discrete: each unit equivalent to 0.25 days) |                                                                                                |
| $u_{a,\tau,\nu}$            | Estimated of number of people with time since infection $a$ at time step $\tau$ , with variant $\nu$                                            |                                                                                                |
| $r_{\tau,\nu}$              | The proportion of incident infections during time step $\tau$ that are of variant $\nu$                                                         |                                                                                                |
| $I_{\tau}$                  | Number of new infections (incidence) during time step $\tau$                                                                                    |                                                                                                |
| $A_{d,w,\theta}(C)$         | Time since infection at Ct value, $C$ , during the down phase of the assumed valley shaped Ct trajectory                                        |                                                                                                |
| $\tilde{A}_{d,w,\theta}(C)$ | Time since infection at the Ct value, $C$ , during the up phase of the assumed valley shaped Ct trajectory                                      |                                                                                                |
| $\tilde{c}_{ijk}$           | Adjusted Ct value of the $k$ th sample of the $j$ th infection of the $i$ th individual                                                         |                                                                                                |
| $F_{sample\ ijk}(C)$        | Cumulative probability for the expected Ct value, $C$ for sample $ijk$                                                                          |                                                                                                |
| $F_{flat}(C)$               | Cumulative probability for the expected Ct value, $C$ , assuming a flat trajectory                                                              |                                                                                                |
| <b>Parameters</b>           | <b>Description</b>                                                                                                                              | <b>Values</b>                                                                                  |
| $\theta_{\nu}$              | Fractional location of the minimal Ct across the infected period, with variant $\nu$                                                            | 0.3                                                                                            |
| $W_{\nu}^{mean}$            | Mean viral trajectory width (infected period, days)                                                                                             | 8                                                                                              |
| $D_{\nu}^{mean}$            | Mean viral trajectory depth (difference between minimum Ct value and 40)                                                                        | Iteratively inferred to equal $10 + 2(30 - \text{mean adj Ct})$ with initial condition: Ct=20. |

|          |                                              |     |
|----------|----------------------------------------------|-----|
| $W^{SD}$ | Standard deviation of viral trajectory width | 5   |
| $D^{SD}$ | Standard deviation of viral trajectory depth | 1.7 |

672

673 **Table 3. Description of additional variables and parameters used in calculation of**  
674 **adjusted Ct values**

675

### 676 **Implementation of analysis**

677

678 All analyses were implemented in Matlab and the code is available at  
679 <https://github.com/helenfryer1000000/epidemiologically-adjusted-viral-load>. Estimation of  
680 adjusted Ct values was implemented using a bespoke script. Partial least squares regression  
681 was implemented using the PLSregress function, which is part of the Statistics and Machine  
682 Learning toolbox in Matlab. Quantile median regression was implemented using the function  
683 `qr_standard`, provided at: [https://github.com/zjph602xtc/Quantile\\_reg](https://github.com/zjph602xtc/Quantile_reg).

684

685

### 686 **References**

687

- 688 1. Davies, N.G., et al., *Estimated transmissibility and impact of SARS-CoV-2 lineage*  
689 *B.1.1.7 in England*. Science, 2021. **372**(6538).
- 690 2. Volz, E., et al., *Assessing transmissibility of SARS-CoV-2 lineage B.1.1.7 in England*.  
691 Nature, 2021. **593**(7858): p. 266-269.
- 692 3. Lyngse, F.P., et al., *Increased transmissibility of SARS-CoV-2 lineage B.1.1.7 by age*  
693 *and viral load*. Nat Commun, 2021. **12**(1): p. 7251.
- 694 4. Allen, H., et al., *Household transmission of COVID-19 cases associated with SARS-*  
695 *CoV-2 delta variant (B.1.617.2): national case-control study*. Lancet Reg Health Eur,  
696 2022. **12**: p. 100252.
- 697 5. Jorgensen, S.B., et al., *Secondary Attack Rates for Omicron and Delta Variants of*  
698 *SARS-CoV-2 in Norwegian Households*. JAMA, 2022. **327**(16): p. 1610-1611.
- 699 6. Plante, J.A., et al., *Spike mutation D614G alters SARS-CoV-2 fitness*. Nature, 2021.  
700 **592**(7852): p. 116-121.
- 701 7. Leung, N.H.L., *Transmissibility and transmission of respiratory viruses*. Nat Rev  
702 Microbiol, 2021. **19**(8): p. 528-545.
- 703 8. Planas, D., et al., *Considerable escape of SARS-CoV-2 Omicron to antibody*  
704 *neutralization*. Nature, 2022. **602**(7898): p. 671-675.
- 705 9. Planas, D., et al., *Reduced sensitivity of SARS-CoV-2 variant Delta to antibody*  
706 *neutralization*. Nature, 2021. **596**(7871): p. 276-280.
- 707 10. Pouwels, K.B., et al., *Community prevalence of SARS-CoV-2 in England from April to*  
708 *November, 2020: results from the ONS Coronavirus Infection Survey*. Lancet Public  
709 Health, 2021. **6**(1): p. e30-e38.
- 710 11. Pouwels, K.B., et al., *Effect of Delta variant on viral burden and vaccine effectiveness*  
711 *against new SARS-CoV-2 infections in the UK*. Nat Med, 2021. **27**(12): p. 2127-2135.
- 712 12. Frampton, D., et al., *Genomic characteristics and clinical effect of the emergent*  
713 *SARS-CoV-2 B.1.1.7 lineage in London, UK: a whole-genome sequencing and*  
714 *hospital-based cohort study*. Lancet Infect Dis, 2021. **21**(9): p. 1246-1256.



- 715 13. Calistri, P., et al., *Infection sustained by lineage B.1.1.7 of SARS-CoV-2 is*  
716 *characterised by longer persistence and higher viral RNA loads in nasopharyngeal*  
717 *swabs*. *Int J Infect Dis*, 2021. **105**: p. 753-755.
- 718 14. Kidd, M., et al., *S-Variant SARS-CoV-2 Lineage B1.1.7 Is Associated With*  
719 *Significantly Higher Viral Load in Samples Tested by TaqPath Polymerase Chain*  
720 *Reaction*. *J Infect Dis*, 2021. **223**(10): p. 1666-1670.
- 721 15. Cosentino, G., et al., *SARS-CoV-2 viral dynamics in infections with Alpha and Beta*  
722 *variants of concern in the French community*. *J Infect*, 2022. **84**(1): p. 94-118.
- 723 16. Kissler, S.M., et al., *Viral Dynamics of SARS-CoV-2 Variants in Vaccinated and*  
724 *Unvaccinated Persons*. *N Engl J Med*, 2021. **385**(26): p. 2489-2491.
- 725 17. Ke, R., et al., *Daily longitudinal sampling of SARS-CoV-2 infection reveals*  
726 *substantial heterogeneity in infectiousness*. *Nat Microbiol*, 2022. **7**(5): p. 640-652.
- 727 18. Golubchik, T., et al., *Early analysis of a potential link between viral load and the*  
728 *N501Y mutation in the SARS-COV-2 spike protein*. *medRxiv*, 2021.
- 729 19. Li, B., et al., *Viral infection and transmission in a large, well-traced outbreak caused*  
730 *by the SARS-CoV-2 Delta variant*. *Nat Commun*, 2022. **13**(1): p. 460.
- 731 20. Ma, Q., et al., *Global Percentage of Asymptomatic SARS-CoV-2 Infections Among the*  
732 *Tested Population and Individuals With Confirmed COVID-19 Diagnosis: A*  
733 *Systematic Review and Meta-analysis*. *JAMA Netw Open*, 2021. **4**(12): p. e2137257.
- 734 21. Chang, M.C., J. Hur, and D. Park, *Interpreting the COVID-19 Test Results: A Guide*  
735 *for Physiatrists*. *Am J Phys Med Rehabil*, 2020. **99**(7): p. 583-585.
- 736 22. Trypsteen, W., et al., *On the whereabouts of SARS-CoV-2 in the human body: A*  
737 *systematic review*. *PLoS Pathog*, 2020. **16**(10): p. e1009037.
- 738 23. Hay, J.A., et al., *Estimating epidemiologic dynamics from cross-sectional viral load*  
739 *distributions*. *Science*, 2021. **373**(6552).
- 740 24. Walker, A.S., et al., *Ct threshold values, a proxy for viral load in community SARS-*  
741 *CoV-2 cases, demonstrate wide variation across populations and over time*. *Elife*,  
742 **2021**. **10**.
- 743 25. Hart, W.S., et al., *Generation time of the alpha and delta SARS-CoV-2 variants: an*  
744 *epidemiological analysis*. *Lancet Infect Dis*, 2022.
- 745 26. Marc, A., et al., *Quantifying the relationship between SARS-CoV-2 viral load and*  
746 *infectiousness*. *Elife*, 2021. **10**.
- 747 27. Lythgoe, K.A., et al., *SARS-CoV-2 within-host diversity and transmission*. *Science*,  
748 **2021**. **372**(6539).
- 749 28. Bonsall, D., et al., *A Comprehensive Genomics Solution for HIV Surveillance and*  
750 *Clinical Monitoring in Low-Income Settings*. *J Clin Microbiol*, 2020. **58**(10).
- 751 29. Baker, D.J., et al., *CoronaHiT: high-throughput sequencing of SARS-CoV-2 genomes*.  
752 *Genome Med*, 2021. **13**(1): p. 21.
- 753 30. Wymant, C., et al., *Easy and accurate reconstruction of whole HIV genomes from*  
754 *short-read sequence data with shiver*. *Virus Evol*, 2018. **4**(1): p. vey007.
- 755 31. O'Toole, A., et al., *Assignment of epidemiological lineages in an emerging pandemic*  
756 *using the pangolin tool*. *Virus Evol*, 2021. **7**(2): p. veab064.

757

## 758 Acknowledgements

759 K.A.L. and H.F. were supported by The Wellcome Trust and The Royal  
760 Society (107652/Z/15/Z to K.A.L.) and by the Li Ka Shing Foundation funding awarded to  
761 K.A.L.

762

763 COG-UK is supported by funding from the Medical Research Council (MRC) part of UK  
764 Research & Innovation (UKRI), the National Institute of Health Research (NIHR) [grant  
765 code: MC\_PC\_19027], and Genome Research Limited, operating as the Wellcome Sanger  
766 Institute. The authors acknowledge use of data generated through the COVID-19 Genomics  
767 Programme funded by the Department of Health and Social Care. The views expressed are  
768 those of the author and not necessarily those of the Department of Health and Social Care or  
769 UKHSA

770 LP gratefully acknowledges funding from the Wellcome Trust and Royal Society (grant  
771 number 202562/Z/16/Z), the UKRI through the JUNIPER modelling consortium (grant  
772 number MR/V038613/1) and the Alan Turing Institute under the EPSRC grant  
773 (EP/N510129/1).

774 Mohammad Adnan Tariq . Contract research at Northumbria University funded by UKHSA  
775 as a DNA sequencing resilience site.

776  
777 Darren Smith funded by UKHSA, COG-UK, Research England E3: HBBE and Northumbria  
778 University.

779  
780 Andrew Nelson & Clare McCann, funded by UKHSA, and Northumbria University

781  
782 Matt Bashton, funded by UKHSA, Research England E3:HBBE

783  
784 Greg Young, funded by Research England E3:HBBE

785  
786 Amy Trebes is funded by the Wellcome (grant reference 203141/Z/16/Z).

787 David Buck is funded by the Wellcome (grant reference 203141/Z/16/Z).

788 Paolo Piazza is funded by the Wellcome (grant reference 203141/Z/16/Z).

789 Lorne Lonie is funded by the Wellcome (grant reference 203141/Z/16/Z).

790 Angie Green is funded by the Wellcome (grant reference 203141/Z/16/Z).

791

792

793

794

## 795 The COVID-19 Genomics UK (COG-UK) consortium

796 June 2021 V.3

797

798

799 **Funding acquisition, Leadership and supervision, Metadata curation, Project administration,**  
800 **Samples and logistics, Sequencing and analysis, Software and analysis tools, and Visualisation:**

801 Dr Samuel C Robson PhD <sup>13, 84</sup>

802

803 **Funding acquisition, Leadership and supervision, Metadata curation, Project administration,**  
804 **Samples and logistics, Sequencing and analysis, and Software and analysis tools:**

805 Dr Thomas R Connor PhD <sup>11, 74</sup> and Prof Nicholas J Loman PhD <sup>43</sup>

806

807 **Leadership and supervision, Metadata curation, Project administration, Samples and logistics,**  
808 **Sequencing and analysis, Software and analysis tools, and Visualisation:**

809 Dr Tanya Golubchik PhD <sup>5</sup>

810  
811 **Funding acquisition, Leadership and supervision, Metadata curation, Samples and logistics,**  
812 **Sequencing and analysis, and Visualisation:**  
813 Dr Rocio T Martinez Nunez PhD <sup>46</sup>  
814  
815 **Funding acquisition, Leadership and supervision, Project administration, Samples and logistics,**  
816 **Sequencing and analysis, and Software and analysis tools:**  
817 Dr David Bonsall PhD <sup>5</sup>  
818  
819 **Funding acquisition, Leadership and supervision, Project administration, Sequencing and analysis,**  
820 **Software and analysis tools, and Visualisation:**  
821 Prof Andrew Rambaut DPhil <sup>104</sup>  
822  
823 **Funding acquisition, Metadata curation, Project administration, Samples and logistics, Sequencing**  
824 **and analysis, and Software and analysis tools:**  
825 Dr Luke B Snell MSc, MBBS <sup>12</sup>  
826  
827 **Leadership and supervision, Metadata curation, Project administration, Samples and logistics,**  
828 **Software and analysis tools, and Visualisation:**  
829 Rich Livett MSc <sup>116</sup>  
830  
831 **Funding acquisition, Leadership and supervision, Metadata curation, Project administration, and**  
832 **Samples and logistics:**  
833 Dr Catherine Ludden PhD <sup>20, 70</sup>  
834  
835 **Funding acquisition, Leadership and supervision, Metadata curation, Samples and logistics, and**  
836 **Sequencing and analysis:**  
837 Dr Sally Corden PhD <sup>74</sup> and Dr Eleni Nastouli FRCPATH <sup>96, 95, 30</sup>  
838  
839 **Funding acquisition, Leadership and supervision, Metadata curation, Sequencing and analysis, and**  
840 **Software and analysis tools:**  
841 Dr Gaia Nebbia PhD, FRCPATH <sup>12</sup>  
842  
843 **Funding acquisition, Leadership and supervision, Project administration, Samples and logistics, and**  
844 **Sequencing and analysis:**  
845 Ian Johnston BSc <sup>116</sup>  
846  
847 **Leadership and supervision, Metadata curation, Project administration, Samples and logistics, and**  
848 **Sequencing and analysis:**  
849 Prof Katrina Lythgoe PhD <sup>5</sup>, Dr M. Estee Torok FRCP <sup>19, 20</sup> and Prof Ian G Goodfellow PhD <sup>24</sup>  
850  
851 **Leadership and supervision, Metadata curation, Project administration, Samples and logistics, and**  
852 **Visualisation:**  
853 Dr Jacqui A Prieto PhD <sup>97, 82</sup> and Dr Kordo Saeed MD, FRCPATH <sup>97, 83</sup>  
854  
855 **Leadership and supervision, Metadata curation, Project administration, Sequencing and analysis,**  
856 **and Software and analysis tools:**  
857 Dr David K Jackson PhD <sup>116</sup>  
858  
859 **Leadership and supervision, Metadata curation, Samples and logistics, Sequencing and analysis,**  
860 **and Visualisation:**

861 Dr Catherine Houlihan PhD <sup>96, 94</sup>  
862  
863 **Leadership and supervision, Metadata curation, Sequencing and analysis, Software and analysis**  
864 **tools, and Visualisation:**  
865 Dr Dan Frampton PhD <sup>94, 95</sup>  
866  
867 **Metadata curation, Project administration, Samples and logistics, Sequencing and analysis, and**  
868 **Software and analysis tools:**  
869 Dr William L Hamilton PhD <sup>19</sup> and Dr Adam A Witney PhD <sup>41</sup>  
870  
871 **Funding acquisition, Samples and logistics, Sequencing and analysis, and Visualisation:**  
872 Dr Giselda Bucca PhD <sup>101</sup>  
873  
874 **Funding acquisition, Leadership and supervision, Metadata curation, and Project administration:**  
875 Dr Cassie F Pope PhD<sup>40, 41</sup>  
876  
877 **Funding acquisition, Leadership and supervision, Metadata curation, and Samples and logistics:**  
878 Dr Catherine Moore PhD <sup>74</sup>  
879  
880 **Funding acquisition, Leadership and supervision, Metadata curation, and Sequencing and analysis:**  
881 Prof Emma C Thomson PhD, FRCP <sup>53</sup>  
882  
883 **Funding acquisition, Leadership and supervision, Project administration, and Samples and**  
884 **logistics:**  
885 Dr Teresa Cutino-Moguel PhD <sup>2</sup>, Dr Ewan M Harrison PhD <sup>116, 102</sup>  
886  
887 **Funding acquisition, Leadership and supervision, Sequencing and analysis, and Visualisation:**  
888 Prof Colin P Smith PhD <sup>101</sup>  
889  
890 **Leadership and supervision, Metadata curation, Project administration, and Sequencing and**  
891 **analysis:**  
892 Fiona Rogan BSc <sup>77</sup>  
893  
894 **Leadership and supervision, Metadata curation, Project administration, and Samples and logistics:**  
895 Shaun M Beckwith MSc <sup>6</sup>, Abigail Murray Degree <sup>6</sup>, Dawn Singleton HNC <sup>6</sup>, Dr Kirstine Eastick PhD,  
896 FRCPATH <sup>37</sup>, Dr Liz A Sheridan PhD <sup>98</sup>, Paul Randell MSc, PgD <sup>99</sup>, Dr Leigh M Jackson PhD <sup>105</sup>, Dr Cristina  
897 V Ariani PhD <sup>116</sup> and Dr Sónia Gonçalves PhD <sup>116</sup>  
898  
899 **Leadership and supervision, Metadata curation, Samples and logistics, and Sequencing and**  
900 **analysis:**  
901 Dr Derek J Fairley PhD <sup>3, 77</sup>, Prof Matthew W Loose PhD <sup>18</sup> and Joanne Watkins MSc <sup>74</sup>  
902  
903 **Leadership and supervision, Metadata curation, Samples and logistics, and Visualisation:**  
904 Dr Samuel Moses MD <sup>25, 106</sup>  
905  
906 **Leadership and supervision, Metadata curation, Sequencing and analysis, and Software and**  
907 **analysis tools:**  
908 Dr Sam Nicholls PhD <sup>43</sup>, Dr Matthew Bull PhD <sup>74</sup> and Dr Roberto Amato PhD <sup>116</sup>  
909  
910 **Leadership and supervision, Project administration, Samples and logistics, and Sequencing and**  
911 **analysis:**

912 Prof Darren L Smith PhD <sup>36, 65, 66</sup>  
913  
914 **Leadership and supervision, Sequencing and analysis, Software and analysis tools, and**  
915 **Visualisation:**  
916 Prof David M Aanensen PhD <sup>14, 116</sup> and Dr Jeffrey C Barrett PhD <sup>116</sup>  
917  
918 **Metadata curation, Project administration, Samples and logistics, and Sequencing and analysis:**  
919 Dr Beatrix Kele PhD <sup>2</sup>, Dr Dinesh Aggarwal MRCP<sup>20, 116, 70</sup>, Dr James G Shepherd MBCHB, MRCP <sup>53</sup>, Dr  
920 Martin D Curran PhD <sup>71</sup> and Dr Surendra Parmar PhD <sup>71</sup>  
921  
922 **Metadata curation, Project administration, Sequencing and analysis, and Software and analysis**  
923 **tools:**  
924 Dr Matthew D Parker PhD <sup>109</sup>  
925  
926 **Metadata curation, Samples and logistics, Sequencing and analysis, and Software and analysis**  
927 **tools:**  
928 Dr Catryn Williams PhD <sup>74</sup>  
929  
930 **Metadata curation, Samples and logistics, Sequencing and analysis, and Visualisation:**  
931 Dr Sharon Glaysher PhD <sup>68</sup>  
932  
933 **Metadata curation, Sequencing and analysis, Software and analysis tools, and Visualisation:**  
934 Dr Anthony P Underwood PhD <sup>14, 116</sup>, Dr Matthew Bashton PhD <sup>36, 65</sup>, Dr Nicole Pacchiarini PhD <sup>74</sup>, Dr  
935 Katie F Loveson PhD <sup>84</sup> and Matthew Byott MSc <sup>95, 96</sup>  
936  
937 **Project administration, Sequencing and analysis, Software and analysis tools, and Visualisation:**  
938 Dr Alessandro M Carabelli PhD <sup>20</sup>  
939  
940 **Funding acquisition, Leadership and supervision, and Metadata curation:**  
941 Dr Kate E Templeton PhD <sup>56, 104</sup>  
942  
943 **Funding acquisition, Leadership and supervision, and Project administration:**  
944 Dr Thushan I de Silva PhD <sup>109</sup>, Dr Dennis Wang PhD <sup>109</sup>, Dr Cordelia F Langford PhD <sup>116</sup> and John  
945 Sillitoe BEng <sup>116</sup>  
946  
947 **Funding acquisition, Leadership and supervision, and Samples and logistics:**  
948 Prof Rory N Gunson PhD, FRCPATH <sup>55</sup>  
949  
950 **Funding acquisition, Leadership and supervision, and Sequencing and analysis:**  
951 Dr Simon Cottrell PhD <sup>74</sup>, Dr Justin O'Grady PhD <sup>75, 103</sup> and Prof Dominic Kwiatkowski PhD <sup>116, 108</sup>  
952  
953 **Leadership and supervision, Metadata curation, and Project administration:**  
954 Dr Patrick J Lillie PhD, FRCP <sup>37</sup>  
955  
956 **Leadership and supervision, Metadata curation, and Samples and logistics:**  
957 Dr Nicholas Cortes MBCHB <sup>33</sup>, Dr Nathan Moore MBCHB <sup>33</sup>, Dr Claire Thomas DPhil <sup>33</sup>, Phillipa J Burns  
958 MSc, DipRCPATH <sup>37</sup>, Dr Tabitha W Mahungu FRCPATH <sup>80</sup> and Steven Liggett BSc <sup>86</sup>  
959  
960 **Leadership and supervision, Metadata curation, and Sequencing and analysis:**  
961 Angela H Beckett MSc <sup>13, 81</sup> and Prof Matthew TG Holden PhD <sup>73</sup>  
962

- 963 **Leadership and supervision, Project administration, and Samples and logistics:**  
964 Dr Lisa J Levett PhD <sup>34</sup>, Dr Husam Osman PhD <sup>70, 35</sup> and Dr Mohammed O Hassan-Ibrahim PhD,  
965 FRCPath <sup>99</sup>  
966
- 967 **Leadership and supervision, Project administration, and Sequencing and analysis:**  
968 Dr David A Simpson PhD <sup>77</sup>  
969
- 970 **Leadership and supervision, Samples and logistics, and Sequencing and analysis:**  
971 Dr Meera Chand PhD <sup>72</sup>, Prof Ravi K Gupta PhD <sup>102</sup>, Prof Alistair C Darby PhD <sup>107</sup> and Prof Steve  
972 Paterson PhD <sup>107</sup>  
973
- 974 **Leadership and supervision, Sequencing and analysis, and Software and analysis tools:**  
975 Prof Oliver G Pybus DPhil <sup>23</sup>, Dr Erik M Volz PhD <sup>39</sup>, Prof Daniela de Angelis PhD <sup>52</sup>, Prof David L  
976 Robertson PhD <sup>53</sup>, Dr Andrew J Page PhD <sup>75</sup> and Dr Inigo Martincorena PhD <sup>116</sup>  
977
- 978 **Leadership and supervision, Sequencing and analysis, and Visualisation:**  
979 Dr Louise Aigrain PhD <sup>116</sup> and Dr Andrew R Bassett PhD <sup>116</sup>  
980
- 981 **Metadata curation, Project administration, and Samples and logistics:**  
982 Dr Nick Wong DPhil, MRCP, FRCPath <sup>50</sup>, Dr Yusri Taha MD, PhD <sup>89</sup>, Michelle J Erkiert BA <sup>99</sup> and Dr  
983 Michael H Spencer Chapman MBBS <sup>116, 102</sup>  
984
- 985 **Metadata curation, Project administration, and Sequencing and analysis:**  
986 Dr Rebecca Dewar PhD <sup>56</sup> and Martin P McHugh MSc <sup>56, 111</sup>  
987
- 988 **Metadata curation, Project administration, and Software and analysis tools:**  
989 Siddharth Mookerjee MPH <sup>38, 57</sup>  
990
- 991 **Metadata curation, Project administration, and Visualisation:**  
992 Stephen Aplin <sup>97</sup>, Matthew Harvey <sup>97</sup>, Thea Sass <sup>97</sup>, Dr Helen Umpleby FRCPath <sup>97</sup> and Helen Wheeler <sup>97</sup>  
993
- 994 **Metadata curation, Samples and logistics, and Sequencing and analysis:**  
995 Dr James P McKenna PhD <sup>3</sup>, Dr Ben Warne MRCP <sup>9</sup>, Joshua F Taylor MSc <sup>22</sup>, Yasmin Chaudhry BSc <sup>24</sup>,  
996 Rhys Izuagbe <sup>24</sup>, Dr Aminu S Jahun PhD <sup>24</sup>, Dr Gregory R Young PhD <sup>36, 65</sup>, Dr Claire McMurray PhD <sup>43</sup>,  
997 Dr Clare M McCann PhD <sup>65, 66</sup>, Dr Andrew Nelson PhD <sup>65, 66</sup> and Scott Elliott <sup>68</sup>  
998
- 999 **Metadata curation, Samples and logistics, and Visualisation:**  
1000 Hannah Lowe MSc <sup>25</sup>  
1001
- 1002 **Metadata curation, Sequencing and analysis, and Software and analysis tools:**  
1003 Dr Anna Price PhD <sup>11</sup>, Matthew R Crown BSc <sup>65</sup>, Dr Sara Rey PhD <sup>74</sup>, Dr Sunando Roy PhD <sup>96</sup> and Dr  
1004 Ben Temperton PhD <sup>105</sup>  
1005
- 1006 **Metadata curation, Sequencing and analysis, and Visualisation:**  
1007 Dr Sharif Shaaban PhD <sup>73</sup> and Dr Andrew R Hesketh PhD <sup>101</sup>  
1008
- 1009 **Project administration, Samples and logistics, and Sequencing and analysis:**  
1010 Dr Kenneth G Laing PhD <sup>41</sup>, Dr Irene M Monahan PhD <sup>41</sup> and Dr Judith Heaney PhD <sup>95, 96, 34</sup>  
1011
- 1012 **Project administration, Samples and logistics, and Visualisation:**  
1013 Dr Emanuela Pelosi FRCPath <sup>97</sup>, Siona Silveira MSc <sup>97</sup> and Dr Eleri Wilson-Davies MD, FRCPath <sup>97</sup>

- 1014  
1015 **Samples and logistics, Software and analysis tools, and Visualisation:**  
1016 Dr Helen Fryer PhD <sup>5</sup>  
1017  
1018 **Sequencing and analysis, Software and analysis tools, and Visualization:**  
1019 Dr Helen Adams PhD <sup>4</sup>, Dr Louis du Plessis PhD <sup>23</sup>, Dr Rob Johnson PhD <sup>39</sup>, Dr William T Harvey PhD <sup>53</sup>,  
1020 <sup>42</sup>, Dr Joseph Hughes PhD <sup>53</sup>, Dr Richard J Orton PhD <sup>53</sup>, Dr Lewis G Spurgin PhD <sup>59</sup>, Dr Yann Bourgeois  
1021 PhD <sup>81</sup>, Dr Chris Ruis PhD <sup>102</sup>, Áine O'Toole MSc <sup>104</sup>, Marina Gourtovaia MSc <sup>116</sup> and Dr Theo  
1022 Sanderson PhD <sup>116</sup>  
1023  
1024 **Funding acquisition, and Leadership and supervision:**  
1025 Dr Christophe Fraser PhD <sup>5</sup>, Dr Jonathan Edgeworth PhD, FRCPath <sup>12</sup>, Prof Judith Breuer MD <sup>96,29</sup>, Dr  
1026 Stephen L Mitchell PhD <sup>105</sup> and Prof John A Todd PhD <sup>115</sup>  
1027  
1028 **Funding acquisition, and Project administration:**  
1029 Michaela John BSc <sup>10</sup> and Dr David Buck PhD <sup>115</sup>  
1030  
1031 **Leadership and supervision, and Metadata curation:**  
1032 Dr Kavitha Gajee MBBS, FRCPath <sup>37</sup> and Dr Gemma L Kay PhD <sup>75</sup>  
1033  
1034 **Leadership and supervision, and Project administration:**  
1035 Prof Sharon J Peacock PhD <sup>20,70</sup> and David Heyburn <sup>74</sup>  
1036  
1037 **Leadership and supervision, and Samples and logistics:**  
1038 Dr Themoula Charalampous PhD <sup>12,46</sup>, Adela Alcolea-Medina <sup>32,112</sup>, Katie Kitchman BSc <sup>37</sup>, Prof Alan  
1039 McNally PhD <sup>43,93</sup>, David T Pritchard MSc, CSci <sup>50</sup>, Dr Samir Dervisevic FRCPath <sup>58</sup>, Dr Peter Muir PhD  
1040 <sup>70</sup>, Dr Esther Robinson PhD <sup>70,35</sup>, Dr Barry B Vipond PhD <sup>70</sup>, Newara A Ramadan MSc, CSci, FIBMS <sup>78</sup>,  
1041 Dr Christopher Jeanes MBBS <sup>90</sup>, Danni Weldon BSc <sup>116</sup>, Jana Catalan MSc <sup>118</sup> and Neil Jones MSc <sup>118</sup>  
1042  
1043 **Leadership and supervision, and Sequencing and analysis:**  
1044 Dr Ana da Silva Filipe PhD <sup>53</sup>, Dr Chris Williams MBBS <sup>74</sup>, Marc Fuchs BSc <sup>77</sup>, Dr Julia Miskelly PhD <sup>77</sup>, Dr  
1045 Aaron R Jeffries PhD <sup>105</sup>, Karen Oliver BSc <sup>116</sup> and Dr Naomi R Park PhD <sup>116</sup>  
1046  
1047 **Metadata curation, and Samples and logistics:**  
1048 Amy Ash BSc <sup>1</sup>, Cherian Koshy MSc, CSci, FIBMS <sup>1</sup>, Magdalena Barrow <sup>7</sup>, Dr Sarah L Buchan PhD <sup>7</sup>, Dr  
1049 Anna Mantzouratou PhD <sup>7</sup>, Dr Gemma Clark PhD <sup>15</sup>, Dr Christopher W Holmes PhD <sup>16</sup>, Sharon  
1050 Campbell MSc <sup>17</sup>, Thomas Davis MSc <sup>21</sup>, Ngee Keong Tan MSc <sup>22</sup>, Dr Julianne R Brown PhD <sup>29</sup>, Dr  
1051 Kathryn A Harris PhD <sup>29,2</sup>, Stephen P Kidd MSc <sup>33</sup>, Dr Paul R Grant PhD <sup>34</sup>, Dr Li Xu-McCrae PhD <sup>35</sup>, Dr  
1052 Alison Cox PhD <sup>38,63</sup>, Pinglawathee Madona <sup>38,63</sup>, Dr Marcus Pond PhD <sup>38,63</sup>, Dr Paul A Randell MBBCh  
1053 <sup>38,63</sup>, Karen T Withell FIBMS <sup>48</sup>, Cheryl Williams MSc <sup>51</sup>, Dr Clive Graham MD <sup>60</sup>, Rebecca Denton-Smith  
1054 BSc <sup>62</sup>, Emma Swindells BSc <sup>62</sup>, Robyn Turnbull BSc <sup>62</sup>, Dr Tim J Sloan PhD <sup>67</sup>, Dr Andrew Bosworth PhD  
1055 <sup>70,35</sup>, Stephanie Hutchings <sup>70</sup>, Hannah M Pymont MSc <sup>70</sup>, Dr Anna Casey PhD <sup>76</sup>, Dr Liz Ratcliffe PhD <sup>76</sup>,  
1056 Dr Christopher R Jones PhD <sup>79,105</sup>, Dr Bridget A Knight PhD <sup>79,105</sup>, Dr Tanzina Haque PhD, FRCPath <sup>80</sup>,  
1057 Dr Jennifer Hart MRCP <sup>80</sup>, Dr Dianne Irish-Tavares FRCPath <sup>80</sup>, Eric Witele MSc <sup>80</sup>, Craig Mower BA <sup>86</sup>,  
1058 Louisa K Watson DipHE <sup>86</sup>, Jennifer Collins BSc <sup>89</sup>, Gary Eltringham BSc <sup>89</sup>, Dorian Crudgington <sup>98</sup>, Ben  
1059 Macklin <sup>98</sup>, Prof Miren Iturriza-Gomara PhD <sup>107</sup>, Dr Anita O Lucaci PhD <sup>107</sup> and Dr Patrick C McClure  
1060 PhD <sup>113</sup>  
1061  
1062 **Metadata curation, and Sequencing and analysis:**  
1063 Matthew Carlile BSc <sup>18</sup>, Dr Nadine Holmes PhD <sup>18</sup>, Dr Christopher Moore PhD <sup>18</sup>, Dr Nathaniel Storey  
1064 PhD <sup>29</sup>, Dr Stefan Rooke PhD <sup>73</sup>, Dr Gonzalo Yebra PhD <sup>73</sup>, Dr Noel Craine DPhil <sup>74</sup>, Malorie Perry MSc

1065 <sup>74</sup>, Dr Nabil-Fareed Alikhan PhD <sup>75</sup>, Dr Stephen Bridgett PhD <sup>77</sup>, Kate F Cook MScR <sup>84</sup>, Christopher  
1066 Fearn MSc <sup>84</sup>, Dr Salman Goudarzi PhD <sup>84</sup>, Prof Ronan A Lyons MD <sup>88</sup>, Dr Thomas Williams MD <sup>104</sup>, Dr  
1067 Sam T Haldenby PhD <sup>107</sup>, Jillian Durham BSc <sup>116</sup> and Dr Steven Leonard PhD <sup>116</sup>

1068

1069 **Metadata curation, and Software and analysis tools:**

1070 Robert M Davies MA (Cantab) <sup>116</sup>

1071

1072 **Project administration, and Samples and logistics:**

1073 Dr Rahul Batra MD <sup>12</sup>, Beth Blane BSc <sup>20</sup>, Dr Moira J Spyer PhD <sup>30,95,96</sup>, Perminder Smith MSc <sup>32,112</sup>,  
1074 Mehmet Yavus <sup>85,109</sup>, Dr Rachel J Williams PhD <sup>96</sup>, Dr Adhyana IK Mahanama MD <sup>97</sup>, Dr Buddhini  
1075 Samaraweera MD <sup>97</sup>, Sophia T Girgis MSc <sup>102</sup>, Samantha E Hansford CSci <sup>109</sup>, Dr Angie Green PhD <sup>115</sup>,  
1076 Dr Charlotte Beaver PhD <sup>116</sup>, Katherine L Bellis <sup>116,102</sup>, Matthew J Dorman <sup>116</sup>, Sally Kay <sup>116</sup>, Liam  
1077 Prestwood <sup>116</sup> and Dr Shavanthi Rajatileka PhD <sup>116</sup>

1078

1079 **Project administration, and Sequencing and analysis:**

1080 Dr Joshua Quick PhD <sup>43</sup>

1081

1082 **Project administration, and Software and analysis tools:**

1083 Radoslaw Poplawski BSc <sup>43</sup>

1084

1085 **Samples and logistics, and Sequencing and analysis:**

1086 Dr Nicola Reynolds PhD <sup>8</sup>, Andrew Mack MPhil <sup>11</sup>, Dr Arthur Morriss PhD <sup>11</sup>, Thomas Whalley BSc <sup>11</sup>,  
1087 Bindi Patel BSc <sup>12</sup>, Dr Iliana Georgana PhD <sup>24</sup>, Dr Myra Hosmillo PhD <sup>24</sup>, Malte L Pinckert MPhil <sup>24</sup>, Dr  
1088 Joanne Stockton PhD <sup>43</sup>, Dr John H Henderson PhD <sup>65</sup>, Amy Hollis HND <sup>65</sup>, Dr William Stanley PhD <sup>65</sup>,  
1089 Dr Wen C Yew PhD <sup>65</sup>, Dr Richard Myers PhD <sup>72</sup>, Dr Alicia Thornton PhD <sup>72</sup>, Alexander Adams BSc <sup>74</sup>,  
1090 Tara Annett BSc <sup>74</sup>, Dr Hibo Asad PhD <sup>74</sup>, Alec Birchley MSc <sup>74</sup>, Jason Coombes BSc <sup>74</sup>, Johnathan M  
1091 Evans MSc <sup>74</sup>, Laia Fina <sup>74</sup>, Bree Gatica-Wilcox MPhil <sup>74</sup>, Lauren Gilbert <sup>74</sup>, Lee Graham BSc <sup>74</sup>, Jessica  
1092 Hey BSc <sup>74</sup>, Ember Hilvers MPH <sup>74</sup>, Sophie Jones MSc <sup>74</sup>, Hannah Jones <sup>74</sup>, Sara Kumziene-  
1093 Summerhayes MSc <sup>74</sup>, Dr Caoimhe McKerr PhD <sup>74</sup>, Jessica Powell BSc <sup>74</sup>, Georgia Pugh <sup>74</sup>, Sarah Taylor  
1094 <sup>74</sup>, Alexander J Trotter MRes <sup>75</sup>, Charlotte A Williams BSc <sup>96</sup>, Leanne M Kermack MSc <sup>102</sup>, Benjamin H  
1095 Foulkes MSc <sup>109</sup>, Marta Gallis MSc <sup>109</sup>, Hailey R Hornsby MSc <sup>109</sup>, Stavroula F Louka MSc <sup>109</sup>, Dr Manoj  
1096 Pohare PhD <sup>109</sup>, Paige Wolverson MSc <sup>109</sup>, Peijun Zhang MSc <sup>109</sup>, George MacIntyre-Cockett BSc <sup>115</sup>,  
1097 Amy Trebes MSc <sup>115</sup>, Dr Robin J Moll PhD <sup>116</sup>, Lynne Ferguson MSc <sup>117</sup>, Dr Emily J Goldstein PhD <sup>117</sup>, Dr  
1098 Alasdair Maclean PhD <sup>117</sup> and Dr Rachael Tomb PhD <sup>117</sup>

1099

1100 **Samples and logistics, and Software and analysis tools:**

1101 Dr Igor Starinskij MSc, MRCP <sup>53</sup>

1102

1103 **Sequencing and analysis, and Software and analysis tools:**

1104 Laura Thomson BSc <sup>5</sup>, Joel Southgate MSc <sup>11,74</sup>, Dr Moritz UG Kraemer DPhil <sup>23</sup>, Dr Jayna Raghvani  
1105 PhD <sup>23</sup>, Dr Alex E Zarebski PhD <sup>23</sup>, Olivia Boyd MSc <sup>39</sup>, Lily Geidelberg MSc <sup>39</sup>, Dr Chris J Illingworth PhD  
1106 <sup>52</sup>, Dr Chris Jackson PhD <sup>52</sup>, Dr David Pascall PhD <sup>52</sup>, Dr Sreenu Vattipally PhD <sup>53</sup>, Timothy M Freeman  
1107 MPhil <sup>109</sup>, Dr Sharon N Hsu PhD <sup>109</sup>, Dr Benjamin B Lindsey MRCP <sup>109</sup>, Dr Keith James PhD <sup>116</sup>, Kevin  
1108 Lewis <sup>116</sup>, Gerry Tonkin-Hill <sup>116</sup> and Dr Jaime M Tovar-Corona PhD <sup>116</sup>

1109

1110 **Sequencing and analysis, and Visualisation:**

1111 MacGregor Cox MSci <sup>20</sup>

1112

1113 **Software and analysis tools, and Visualisation:**

1114 Dr Khalil Abudahab PhD <sup>14,116</sup>, Mirko Menegazzo <sup>14</sup>, Ben EW Taylor MEng <sup>14,116</sup>, Dr Corin A Yeats PhD  
1115 <sup>14</sup>, Afrida Mukaddas BTech <sup>53</sup>, Derek W Wright MSc <sup>53</sup>, Dr Leonardo de Oliveira Martins PhD <sup>75</sup>, Dr



1116 Rachel Colquhoun DPhil <sup>104</sup>, Verity Hill <sup>104</sup>, Dr Ben Jackson PhD <sup>104</sup>, Dr JT McCrone PhD <sup>104</sup>, Dr Nathan  
1117 Medd PhD <sup>104</sup>, Dr Emily Scher PhD <sup>104</sup> and Jon-Paul Keatley <sup>116</sup>

1118

1119 **Leadership and supervision:**

1120 Dr Tanya Curran PhD <sup>3</sup>, Dr Sian Morgan FRCPATH <sup>10</sup>, Prof Patrick Maxwell PhD <sup>20</sup>, Prof Ken Smith PhD  
1121 <sup>20</sup>, Dr Sahar Eldirdiri MBBS, MSc, FRCPATH <sup>21</sup>, Anita Kenyon MSc <sup>21</sup>, Prof Alison H Holmes MD <sup>38,57</sup>, Dr  
1122 James R Price PhD <sup>38,57</sup>, Dr Tim Wyatt PhD <sup>69</sup>, Dr Alison E Mather PhD <sup>75</sup>, Dr Timofey Skvortsov PhD <sup>77</sup>  
1123 and Prof John A Hartley PhD <sup>96</sup>

1124

1125 **Metadata curation:**

1126 Prof Martyn Guest PhD <sup>11</sup>, Dr Christine Kitchen PhD <sup>11</sup>, Dr Ian Merrick PhD <sup>11</sup>, Robert Munn BSc <sup>11</sup>, Dr  
1127 Beatrice Bertolusso Degree <sup>33</sup>, Dr Jessica Lynch MBCHB <sup>33</sup>, Dr Gabrielle Vernet MBBS <sup>33</sup>, Stuart Kirk  
1128 MSc <sup>34</sup>, Dr Elizabeth Wastnedge MD <sup>56</sup>, Dr Rachael Stanley PhD <sup>58</sup>, Giles Idle <sup>64</sup>, Dr Declan T Bradley  
1129 PhD <sup>69,77</sup>, Nicholas F Killough MSc <sup>69</sup>, Dr Jennifer Poyner MD <sup>79</sup> and Matilde Mori BSc <sup>110</sup>

1130

1131 **Project administration:**

1132 Owen Jones BSc <sup>11</sup>, Victoria Wright BSc <sup>18</sup>, Ellena Brooks MA <sup>20</sup>, Carol M Churcher BSc <sup>20</sup>, Mireille  
1133 Fragakis HND <sup>20</sup>, Dr Katerina Galai PhD <sup>20,70</sup>, Dr Andrew Jermy PhD <sup>20</sup>, Sarah Judges BA <sup>20</sup>, Georgina M  
1134 McManus BSc <sup>20</sup>, Kim S Smith <sup>20</sup>, Dr Elaine Westwick PhD <sup>20</sup>, Dr Stephen W Attwood PhD <sup>23</sup>, Dr  
1135 Frances Bolt PhD <sup>38,57</sup>, Dr Alisha Davies PhD <sup>74</sup>, Elen De Lacy MPH <sup>74</sup>, Fatima Downing <sup>74</sup>, Sue Edwards  
1136 <sup>74</sup>, Lizzie Meadows MA <sup>75</sup>, Sarah Jeremiah MSc <sup>97</sup>, Dr Nikki Smith PhD <sup>109</sup> and Luke Foulser <sup>116</sup>

1137

1138 **Samples and logistics:**

1139 Amita Patel BSc <sup>12</sup>, Dr Louise Berry PhD <sup>15</sup>, Dr Tim Boswell PhD <sup>15</sup>, Dr Vicki M Fleming PhD <sup>15</sup>, Dr  
1140 Hannah C Howson-Wells PhD <sup>15</sup>, Dr Amelia Joseph PhD <sup>15</sup>, Manjinder Khakh <sup>15</sup>, Dr Michelle M Lister  
1141 PhD <sup>15</sup>, Paul W Bird MSc, MRes <sup>16</sup>, Karlie Fallon <sup>16</sup>, Thomas Helmer <sup>16</sup>, Dr Claire L McMurray PhD <sup>16</sup>,  
1142 Mina Odedra BSc <sup>16</sup>, Jessica Shaw BSc <sup>16</sup>, Dr Julian W Tang PhD <sup>16</sup>, Nicholas J Willford MSc <sup>16</sup>, Victoria  
1143 Blakey BSc <sup>17</sup>, Dr Veena Raviprakash MD <sup>17</sup>, Nicola Sheriff BSc <sup>17</sup>, Lesley-Anne Williams BSc <sup>17</sup>, Theresa  
1144 Feltwell MSc <sup>20</sup>, Dr Luke Bedford PhD <sup>26</sup>, Dr James S Cargill PhD <sup>27</sup>, Warwick Hughes MSc <sup>27</sup>, Dr  
1145 Jonathan Moore MD <sup>28</sup>, Susanne Stonehouse BSc <sup>28</sup>, Laura Atkinson MSc <sup>29</sup>, Jack CD Lee MSc <sup>29</sup>, Dr  
1146 Divya Shah PhD <sup>29</sup>, Natasha Ohemeng-Kumi MSc <sup>32,112</sup>, John Ramble MSc <sup>32,112</sup>, Jasveen Sehmi MSc <sup>32</sup>,  
1147 <sup>112</sup>, Dr Rebecca Williams BMBS <sup>33</sup>, Wendy Chatterton MSc <sup>34</sup>, Monika Pusok MSc <sup>34</sup>, William Everson  
1148 MSc <sup>37</sup>, Anibolina Castigador IBMS HCPC <sup>44</sup>, Emily Macnaughton FRCPATH <sup>44</sup>, Dr Kate El Bouzidi MRCP  
1149 <sup>45</sup>, Dr Temi Lampejo FRCPATH <sup>45</sup>, Dr Malur Sudhanva FRCPATH <sup>45</sup>, Cassie Breen BSc <sup>47</sup>, Dr Graciela Sluga  
1150 MD, MSc <sup>48</sup>, Dr Shazaad SY Ahmad MSc <sup>49,70</sup>, Dr Ryan P George PhD <sup>49</sup>, Dr Nicholas W Machin MSc <sup>49</sup>,  
1151 <sup>70</sup>, Debbie Binns BSc <sup>50</sup>, Victoria James BSc <sup>50</sup>, Dr Rachel Blacow MBCHB <sup>55</sup>, Dr Lindsay Coupland PhD  
1152 <sup>58</sup>, Dr Louise Smith PhD <sup>59</sup>, Dr Edward Barton MD <sup>60</sup>, Debra Padgett BSc <sup>60</sup>, Garren Scott BSc <sup>60</sup>, Dr  
1153 Aidan Cross MBCHB <sup>61</sup>, Dr Mariyam Mirfenderesky FRCPATH <sup>61</sup>, Jane Greenaway MSc <sup>62</sup>, Kevin Cole <sup>64</sup>,  
1154 Phillip Clarke <sup>67</sup>, Nichola Duckworth <sup>67</sup>, Sarah Walsh <sup>67</sup>, Kelly Bicknell <sup>68</sup>, Robert Impey MSc <sup>68</sup>, Dr  
1155 Sarah Wyllie PhD <sup>68</sup>, Richard Hopes <sup>70</sup>, Dr Chloe Bishop PhD <sup>72</sup>, Dr Vicki Chalker PhD <sup>72</sup>, Dr Ian Harrison  
1156 PhD <sup>72</sup>, Laura Gifford MSc <sup>74</sup>, Dr Zoltan Molnar PhD <sup>77</sup>, Dr Cressida Auckland FRCPATH <sup>79</sup>, Dr Cariad  
1157 Evans PhD <sup>85,109</sup>, Dr Kate Johnson PhD <sup>85,109</sup>, Dr David G Partridge FRCP, FRCPATH <sup>85,109</sup>, Dr  
1158 Mohammad Raza PhD <sup>85,109</sup>, Paul Baker MD <sup>86</sup>, Prof Stephen Bonner PhD <sup>86</sup>, Sarah Essex <sup>86</sup>, Leanne J  
1159 Murray <sup>86</sup>, Andrew I Lawton MSc <sup>87</sup>, Dr Shirelle Burton-Fanning MD <sup>89</sup>, Dr Brendan Al Payne MD <sup>89</sup>, Dr  
1160 Sheila Waugh MD <sup>89</sup>, Andrea N Gomes MSc <sup>91</sup>, Maimuna Kimuli MSc <sup>91</sup>, Darren R Murray MSc <sup>91</sup>,  
1161 Paula Ashfield MSc <sup>92</sup>, Dr Donald Dobie MBCHB <sup>92</sup>, Dr Fiona Ashford PhD <sup>93</sup>, Dr Angus Best PhD <sup>93</sup>, Dr  
1162 Liam Crawford PhD <sup>93</sup>, Dr Nicola Cumley PhD <sup>93</sup>, Dr Megan Mayhew PhD <sup>93</sup>, Dr Oliver Megram PhD <sup>93</sup>,  
1163 Dr Jeremy Mirza PhD <sup>93</sup>, Dr Emma Moles-Garcia PhD <sup>93</sup>, Dr Benita Percival PhD <sup>93</sup>, Megan Driscoll BSc  
1164 <sup>96</sup>, Leah Ensell BSc <sup>96</sup>, Dr Helen L Lowe PhD <sup>96</sup>, Laurentiu Maftai BSc <sup>96</sup>, Matteo Mondani MSc <sup>96</sup>,  
1165 Nicola J Chaloner BSc <sup>99</sup>, Benjamin J Cogger BSc <sup>99</sup>, Lisa J Easton MSc <sup>99</sup>, Hannah Huckson BSc <sup>99</sup>,  
1166 Jonathan Lewis MSc, PgD, FIBMS <sup>99</sup>, Sarah Lowdon BSc <sup>99</sup>, Cassandra S Malone MSc <sup>99</sup>, Florence

1167 Munemo BSc<sup>99</sup>, Manasa Mutingwende MSc<sup>99</sup>, Roberto Nicodemi BSc<sup>99</sup>, Olga Podplomyk FD<sup>99</sup>,  
1168 Thomas Somassa BSc<sup>99</sup>, Dr Andrew Beggs PhD<sup>100</sup>, Dr Alex Richter PhD<sup>100</sup>, Claire Cormie<sup>102</sup>, Joana  
1169 Dias MSc<sup>102</sup>, Sally Forrest BSc<sup>102</sup>, Dr Ellen E Higginson PhD<sup>102</sup>, Mailis Maes MPhil<sup>102</sup>, Jamie Young  
1170 BSc<sup>102</sup>, Dr Rose K Davidson PhD<sup>103</sup>, Kathryn A Jackson MSc<sup>107</sup>, Dr Alexander J Keeley MRCP<sup>109</sup>, Prof  
1171 Jonathan Ball PhD<sup>113</sup>, Timothy Byaruhanga MSc<sup>113</sup>, Dr Joseph G Chappell PhD<sup>113</sup>, Jayasree Dey MSc  
1172<sup>113</sup>, Jack D Hill MSc<sup>113</sup>, Emily J Park MSc<sup>113</sup>, Arezou Fanaie MSc<sup>114</sup>, Rachel A Hilson MSc<sup>114</sup>, Geraldine  
1173 Yaze MSc<sup>114</sup> and Stephanie Lo<sup>116</sup>

1174

#### 1175 **Sequencing and analysis:**

1176 Safiah Afifi BSc<sup>10</sup>, Robert Beer BSc<sup>10</sup>, Joshua Maksimovic FD<sup>10</sup>, Kathryn McCluggage Masters<sup>10</sup>, Karla  
1177 Spellman FD<sup>10</sup>, Catherine Bresner BSc<sup>11</sup>, William Fuller BSc<sup>11</sup>, Dr Angela Marchbank BSc<sup>11</sup>, Trudy  
1178 Workman HNC<sup>11</sup>, Dr Ekaterina Shelest PhD<sup>13,81</sup>, Dr Johnny Debebe PhD<sup>18</sup>, Dr Fei Sang PhD<sup>18</sup>, Dr  
1179 Sarah Francois PhD<sup>23</sup>, Bernardo Gutierrez MSc<sup>23</sup>, Dr Tetyana I Vasylyeva DPhil<sup>23</sup>, Dr Flavia Flaviani  
1180 PhD<sup>31</sup>, Dr Manon Ragonnet-Cronin PhD<sup>39</sup>, Dr Katherine L Smollett PhD<sup>42</sup>, Alice Broos BSc<sup>53</sup>, Daniel  
1181 Mair BSc<sup>53</sup>, Jenna Nichols BSc<sup>53</sup>, Dr Kyriaki Nomikou PhD<sup>53</sup>, Dr Lily Tong PhD<sup>53</sup>, Ioulia Tsatsani MSc  
1182<sup>53</sup>, Prof Sarah O'Brien PhD<sup>54</sup>, Prof Steven Rushton PhD<sup>54</sup>, Dr Roy Sanderson PhD<sup>54</sup>, Dr Jon Perkins  
1183 MBCHB<sup>55</sup>, Seb Cotton MSc<sup>56</sup>, Abbie Gallagher BSc<sup>56</sup>, Dr Elias Allara MD, PhD<sup>70,102</sup>, Clare Pearson  
1184 MSc<sup>70,102</sup>, Dr David Bibby PhD<sup>72</sup>, Dr Gavin Dabrera PhD<sup>72</sup>, Dr Nicholas Ellaby PhD<sup>72</sup>, Dr Eileen  
1185 Gallagher PhD<sup>72</sup>, Dr Jonathan Hubb PhD<sup>72</sup>, Dr Angie Lackenby PhD<sup>72</sup>, Dr David Lee PhD<sup>72</sup>, Nikos  
1186 Manesis<sup>72</sup>, Dr Tamyo Mbisa PhD<sup>72</sup>, Dr Steven Platt PhD<sup>72</sup>, Katherine A Twohig<sup>72</sup>, Dr Mari Morgan  
1187 PhD<sup>74</sup>, Alp Aydin MSci<sup>75</sup>, David J Baker BEng<sup>75</sup>, Dr Ebenezer Foster-Nyarko PhD<sup>75</sup>, Dr Sophie J  
1188 Prosolek PhD<sup>75</sup>, Steven Rudder<sup>75</sup>, Chris Baxter BSc<sup>77</sup>, Sílvia F Carvalho MSc<sup>77</sup>, Dr Deborah Lavin PhD  
1189<sup>77</sup>, Dr Arun Mariappan PhD<sup>77</sup>, Dr Clara Radulescu PhD<sup>77</sup>, Dr Aditi Singh PhD<sup>77</sup>, Miao Tang MD<sup>77</sup>,  
1190 Helen Morcrette BSc<sup>79</sup>, Nadua Bayzid BSc<sup>96</sup>, Marius Cotic MSc<sup>96</sup>, Dr Carlos E Balcazar PhD<sup>104</sup>, Dr  
1191 Michael D Gallagher PhD<sup>104</sup>, Dr Daniel Maloney PhD<sup>104</sup>, Thomas D Stanton BSc<sup>104</sup>, Dr Kathleen A  
1192 Williamson PhD<sup>104</sup>, Dr Robin Manley PhD<sup>105</sup>, Michelle L Michelsen BSc<sup>105</sup>, Dr Christine M Sambles  
1193 PhD<sup>105</sup>, Dr David J Studholme PhD<sup>105</sup>, Joanna Warwick-Dugdale BSc<sup>105</sup>, Richard Eccles MSc<sup>107</sup>,  
1194 Matthew Gemmell MSc<sup>107</sup>, Dr Richard Gregory PhD<sup>107</sup>, Dr Margaret Hughes PhD<sup>107</sup>, Charlotte  
1195 Nelson MSc<sup>107</sup>, Dr Lucille Rainbow PhD<sup>107</sup>, Dr Edith E Vamos PhD<sup>107</sup>, Hermione J Webster BSc<sup>107</sup>, Dr  
1196 Mark Whitehead PhD<sup>107</sup>, Claudia Wierzbicki BSc<sup>107</sup>, Dr Adrienn Angyal PhD<sup>109</sup>, Dr Luke R Green PhD  
1197<sup>109</sup>, Dr Max Whiteley PhD<sup>109</sup>, Emma Betteridge BSc<sup>116</sup>, Dr Iraad F Bronner PhD<sup>116</sup>, Ben W Farr BSc<sup>116</sup>,  
1198 Scott Goodwin MSc<sup>116</sup>, Dr Stefanie V Lensing PhD<sup>116</sup>, Shane A McCarthy<sup>116,102</sup>, Dr Michael A Quail  
1199 PhD<sup>116</sup>, Diana Rajan MSc<sup>116</sup>, Dr Nicholas M Redshaw PhD<sup>116</sup>, Carol Scott<sup>116</sup>, Lesley Shirley MSc<sup>116</sup>  
1200 and Scott AJ Thurston BSc<sup>116</sup>

1201

#### 1202 **Software and analysis tools:**

1203 Dr Will Rowe PhD<sup>43</sup>, Amy Gaskin MSc<sup>74</sup>, Dr Thanh Le-Viet PhD<sup>75</sup>, James Bonfield BSc<sup>116</sup>, Jennifer  
1204 Liddle<sup>116</sup> and Andrew Whitwham BSc<sup>116</sup>

1205

1206 **1** Barking, Havering and Redbridge University Hospitals NHS Trust, **2** Barts Health NHS Trust, **3** Belfast Health &  
1207 Social Care Trust, **4** Betsi Cadwaladr University Health Board, **5** Big Data Institute, Nuffield Department of  
1208 Medicine, University of Oxford, **6** Blackpool Teaching Hospitals NHS Foundation Trust, **7** Bournemouth  
1209 University, **8** Cambridge Stem Cell Institute, University of Cambridge, **9** Cambridge University Hospitals NHS  
1210 Foundation Trust, **10** Cardiff and Vale University Health Board, **11** Cardiff University, **12** Centre for Clinical  
1211 Infection and Diagnostics Research, Department of Infectious Diseases, Guy's and St Thomas' NHS Foundation  
1212 Trust, **13** Centre for Enzyme Innovation, University of Portsmouth, **14** Centre for Genomic Pathogen  
1213 Surveillance, University of Oxford, **15** Clinical Microbiology Department, Queens Medical Centre, Nottingham  
1214 University Hospitals NHS Trust, **16** Clinical Microbiology, University Hospitals of Leicester NHS Trust, **17** County  
1215 Durham and Darlington NHS Foundation Trust, **18** Deep Seq, School of Life Sciences, Queens Medical Centre,  
1216 University of Nottingham, **19** Department of Infectious Diseases and Microbiology, Cambridge University  
1217 Hospitals NHS Foundation Trust, **20** Department of Medicine, University of Cambridge, **21** Department of  
1218 Microbiology, Kettering General Hospital, **22** Department of Microbiology, South West London Pathology, **23**  
1219 Department of Zoology, University of Oxford, **24** Division of Virology, Department of Pathology, University of

1220 Cambridge, **25** East Kent Hospitals University NHS Foundation Trust, **26** East Suffolk and North Essex NHS  
1221 Foundation Trust, **27** East Sussex Healthcare NHS Trust, **28** Gateshead Health NHS Foundation Trust, **29** Great  
1222 Ormond Street Hospital for Children NHS Foundation Trust, **30** Great Ormond Street Institute of Child Health  
1223 (GOS ICH), University College London (UCL), **31** Guy's and St. Thomas' Biomedical Research Centre, **32** Guy's  
1224 and St. Thomas' NHS Foundation Trust, **33** Hampshire Hospitals NHS Foundation Trust, **34** Health Services  
1225 Laboratories, **35** Heartlands Hospital, Birmingham, **36** Hub for Biotechnology in the Built Environment,  
1226 Northumbria University, **37** Hull University Teaching Hospitals NHS Trust, **38** Imperial College Healthcare NHS  
1227 Trust, **39** Imperial College London, **40** Infection Care Group, St George's University Hospitals NHS Foundation  
1228 Trust, **41** Institute for Infection and Immunity, St George's University of London, **42** Institute of Biodiversity,  
1229 Animal Health & Comparative Medicine, **43** Institute of Microbiology and Infection, University of Birmingham,  
1230 **44** Isle of Wight NHS Trust, **45** King's College Hospital NHS Foundation Trust, **46** King's College London, **47**  
1231 Liverpool Clinical Laboratories, **48** Maidstone and Tunbridge Wells NHS Trust, **49** Manchester University NHS  
1232 Foundation Trust, **50** Microbiology Department, Buckinghamshire Healthcare NHS Trust, **51** Microbiology,  
1233 Royal Oldham Hospital, **52** MRC Biostatistics Unit, University of Cambridge, **53** MRC-University of Glasgow  
1234 Centre for Virus Research, **54** Newcastle University, **55** NHS Greater Glasgow and Clyde, **56** NHS Lothian, **57**  
1235 NIHR Health Protection Research Unit in HCAI and AMR, Imperial College London, **58** Norfolk and Norwich  
1236 University Hospitals NHS Foundation Trust, **59** Norfolk County Council, **60** North Cumbria Integrated Care NHS  
1237 Foundation Trust, **61** North Middlesex University Hospital NHS Trust, **62** North Tees and Hartlepool NHS  
1238 Foundation Trust, **63** North West London Pathology, **64** Northumbria Healthcare NHS Foundation Trust, **65**  
1239 Northumbria University, **66** NU-OMICS, Northumbria University, **67** Path Links, Northern Lincolnshire and  
1240 Goole NHS Foundation Trust, **68** Portsmouth Hospitals University NHS Trust, **69** Public Health Agency,  
1241 Northern Ireland, **70** Public Health England, **71** Public Health England, Cambridge, **72** Public Health England,  
1242 Colindale, **73** Public Health Scotland, **74** Public Health Wales, **75** Quadram Institute Bioscience, **76** Queen  
1243 Elizabeth Hospital, Birmingham, **77** Queen's University Belfast, **78** Royal Brompton and Harefield Hospitals, **79**  
1244 Royal Devon and Exeter NHS Foundation Trust, **80** Royal Free London NHS Foundation Trust, **81** School of  
1245 Biological Sciences, University of Portsmouth, **82** School of Health Sciences, University of Southampton, **83**  
1246 School of Medicine, University of Southampton, **84** School of Pharmacy & Biomedical Sciences, University of  
1247 Portsmouth, **85** Sheffield Teaching Hospitals NHS Foundation Trust, **86** South Tees Hospitals NHS Foundation  
1248 Trust, **87** Southwest Pathology Services, **88** Swansea University, **89** The Newcastle upon Tyne Hospitals NHS  
1249 Foundation Trust, **90** The Queen Elizabeth Hospital King's Lynn NHS Foundation Trust, **91** The Royal Marsden  
1250 NHS Foundation Trust, **92** The Royal Wolverhampton NHS Trust, **93** Turnkey Laboratory, University of  
1251 Birmingham, **94** University College London Division of Infection and Immunity, **95** University College London  
1252 Hospital Advanced Pathogen Diagnostics Unit, **96** University College London Hospitals NHS Foundation Trust,  
1253 **97** University Hospital Southampton NHS Foundation Trust, **98** University Hospitals Dorset NHS Foundation  
1254 Trust, **99** University Hospitals Sussex NHS Foundation Trust, **100** University of Birmingham, **101** University of  
1255 Brighton, **102** University of Cambridge, **103** University of East Anglia, **104** University of Edinburgh, **105**  
1256 University of Exeter, **106** University of Kent, **107** University of Liverpool, **108** University of Oxford, **109**  
1257 University of Sheffield, **110** University of Southampton, **111** University of St Andrews, **112** Viapath, Guy's and  
1258 St Thomas' NHS Foundation Trust, and King's College Hospital NHS Foundation Trust, **113** Virology, School of  
1259 Life Sciences, Queens Medical Centre, University of Nottingham, **114** Watford General Hospital, **115** Wellcome  
1260 Centre for Human Genetics, Nuffield Department of Medicine, University of Oxford, **116** Wellcome Sanger  
1261 Institute, **117** West of Scotland Specialist Virology Centre, NHS Greater Glasgow and Clyde, **118** Whittington  
1262 Health NHS Trust  
1263

| Reference      | Ct values                                                              |                                                                                                                                                    |                                                                                                                                   |                                                                                                                                    | How were individuals chosen to be part of the study                                                                                         | Longitudinal?                                                                                                                      | How was strain determined?       |
|----------------|------------------------------------------------------------------------|----------------------------------------------------------------------------------------------------------------------------------------------------|-----------------------------------------------------------------------------------------------------------------------------------|------------------------------------------------------------------------------------------------------------------------------------|---------------------------------------------------------------------------------------------------------------------------------------------|------------------------------------------------------------------------------------------------------------------------------------|----------------------------------|
|                | Predecessor variants to B.1.17                                         | B.1.1.7                                                                                                                                            | B.1.351                                                                                                                           | Delta                                                                                                                              |                                                                                                                                             |                                                                                                                                    |                                  |
| Frampton [12]  | Ct Mean=32<br>SD=4.8<br>N=143                                          | Mean Ct=28.8<br>SD=4.7<br>N=341                                                                                                                    |                                                                                                                                   |                                                                                                                                    | Individuals acutely admitted to hospital in London.                                                                                         | No                                                                                                                                 | S-gene target failure            |
| Calistri [13]  | Median Ct=16.9<br>95% CI=[10.4,19.9]<br>N=965                          | Median Ct=15.8<br>95% CI=[9.6,19.6]<br>N=313<br><br>p-value<10 <sup>-4</sup> (relative to predecessor)                                             |                                                                                                                                   |                                                                                                                                    | Swabs from three provinces of Abruzzo in Italy were collected based on clinical symptoms or reported contact with confirmed COVID-19 cases. | Yes, but only from some individuals. Infected periods were calculated from only those individuals with 2 or more positive samples. | Whole genome sequencing          |
| Kidd [14]      | median Ct (ORF1ab)=22.30<br>median Ct (N gene)=23.1<br>N=450           | median Ct (ORF1ab)=18.16<br>median Ct (N gene)=19.39<br>N=178<br><br>p-value<10 <sup>-5</sup> (relative to predecessor for both ORF1ab and N gene) |                                                                                                                                   |                                                                                                                                    | Samples in the UK Department of Health and Social Care Test and Trace network.                                                              | No                                                                                                                                 | S-gene target failure            |
| Cosentino [15] | Ct at self reported symptom onset=22.7<br>95% CI=[22.4,23.0]<br>N=3272 | Ct at self reported symptom onset= 21.3<br>95% CI=[21.1,21.6]<br>N=11496<br><br>p-value<10 <sup>-6</sup> (relative to predecessor)                 | Ct at self reported symptom onset= 21.6<br>95% CI=[21.1,22.0]<br>N=1366<br><br>p-value<10 <sup>-6</sup> (relative to predecessor) |                                                                                                                                    | Community testing. Symptomatic individuals                                                                                                  | Principally no, although 20% of individuals had two or more samples                                                                | S-gene target failure            |
| Kissler [16]   | Peak viral concentration:<br>Ct=20.1<br>95% CI=[18.3,21.7]<br>N=41     | Peak viral concentration<br>Ct=21.0<br>95% CI=[19.1,20.9]<br>N=36<br><br>No meaningful difference compared to predecessor reported                 |                                                                                                                                   | Peak viral concentration<br>Ct=19.8<br>95% CI=[18.0,22.0]<br>N=36<br><br>No meaningful difference compared to predecessor reported | Individuals associated with a professional basketball league                                                                                | Yes (testing done daily)                                                                                                           | Whole genome sequencing          |
| Ke [17]        | Predicted minimum Ct (in saliva)= 23.7<br>N=44                         | Predicted minimum Ct (in saliva)= 24.2<br>N=16<br>p-value=0.32 (relative to predecessor)                                                           |                                                                                                                                   |                                                                                                                                    | Positive samples, or contacts of positive samples, from twice weekly testing of all faculty, staff and students at a university campus.     | Yes (daily testing for up to 14 days)                                                                                              | Whole genome sequencing          |
| Pouwels [11]   |                                                                        | Median Ct=31.6 *<br>IQR=[22.8,33.7]<br>N=577                                                                                                       |                                                                                                                                   | Median Ct=30.1<br>IQR=[18.6,33.7]<br>N=110                                                                                         | Population representative survey (includes asymptomatic)                                                                                    | Yes, although samples are typically spaced 1 week or 1                                                                             | Estimated based upon sample date |

|         |                                         |                                                                                              |  |                                                                                             |                                   |                                                                                                 |                            |
|---------|-----------------------------------------|----------------------------------------------------------------------------------------------|--|---------------------------------------------------------------------------------------------|-----------------------------------|-------------------------------------------------------------------------------------------------|----------------------------|
|         |                                         | *in new PCR positives vaccinated for 14<br>≥21 days after dose 1 or<br><14 days after dose 2 |  | in new PCR-positives vaccinated for 14<br>≥21 days after dose 1 or<br><14 days after dose 2 |                                   | month apart,<br>meaning that<br>most recorded<br>infections have<br>only one<br>positive sample |                            |
| Li [19] | Median Ct =34.31<br>IQR=[31-36]<br>N=63 |                                                                                              |  | Median Ct =24<br>IQR=[19-29]<br>N=62                                                        | Close contacts of confirmed cases | Yes (daily<br>testing)                                                                          | Whole genome<br>sequencing |

1265 **Supplementary Table 1. A review of published studies investigating the impact of viral variant on Ct values.**

|                                                                                         | Variance inflation factor (VIF) |             |
|-----------------------------------------------------------------------------------------|---------------------------------|-------------|
|                                                                                         | Oxford                          | Northumbria |
| <b>Sample date</b>                                                                      | 7.5*                            | 3.4*        |
| <b>Age</b>                                                                              | 1.6                             | 2.8         |
| <b>Prior exposure</b><br><i>Ref= vaccine and AB -ve</i>                                 |                                 |             |
| AB +ve                                                                                  | 2.1                             | 4.1         |
| Vaccinated                                                                              | 4.1                             | 5.2         |
| <b>Variant (in vaccine and AB -ve)</b><br><i>Ref=Alpha (Oxford), Delta(Northumbria)</i> |                                 |             |
| B.1.177                                                                                 | 1.1                             |             |
| Delta                                                                                   | 1.2                             |             |
| BA.1 Omicron                                                                            |                                 | 1.3         |
| <b>Variant (in AB+ve)</b><br><i>Ref=Alpha (Oxford), Delta(Northumbria)</i>              |                                 |             |
| B.1.177                                                                                 | 1.4                             |             |
| Delta                                                                                   | 1.7                             |             |
| BA.1 Omicron                                                                            |                                 | 4.1         |
| <b>Variant (in vaccinated)</b><br><i>Ref=Alpha (Oxford), Delta(Northumbria)</i>         |                                 |             |
| B.1.177                                                                                 | 1.0                             |             |
| Delta                                                                                   | 5.0                             |             |
| BA.1 Omicron                                                                            |                                 | 2.2         |
| <b>Vaccine dose in vaccinated</b><br><i>Ref=1 dose</i>                                  |                                 |             |
| 2 doses                                                                                 | 2.3                             | 5.3         |
| 3 doses                                                                                 |                                 | 2.1         |
| <b>Sex</b><br><i>Ref=female</i>                                                         |                                 |             |
| Male                                                                                    | 1.0                             | 1.0         |
| <b>Vaccine product</b><br><i>Ref=Pfizer</i>                                             |                                 |             |
| AstraZeneca                                                                             | 1.4                             | 1.5         |

1266 **Supplementary table 2. Variance inflation factor (VIF) values.**

1267

1268

1269

1270

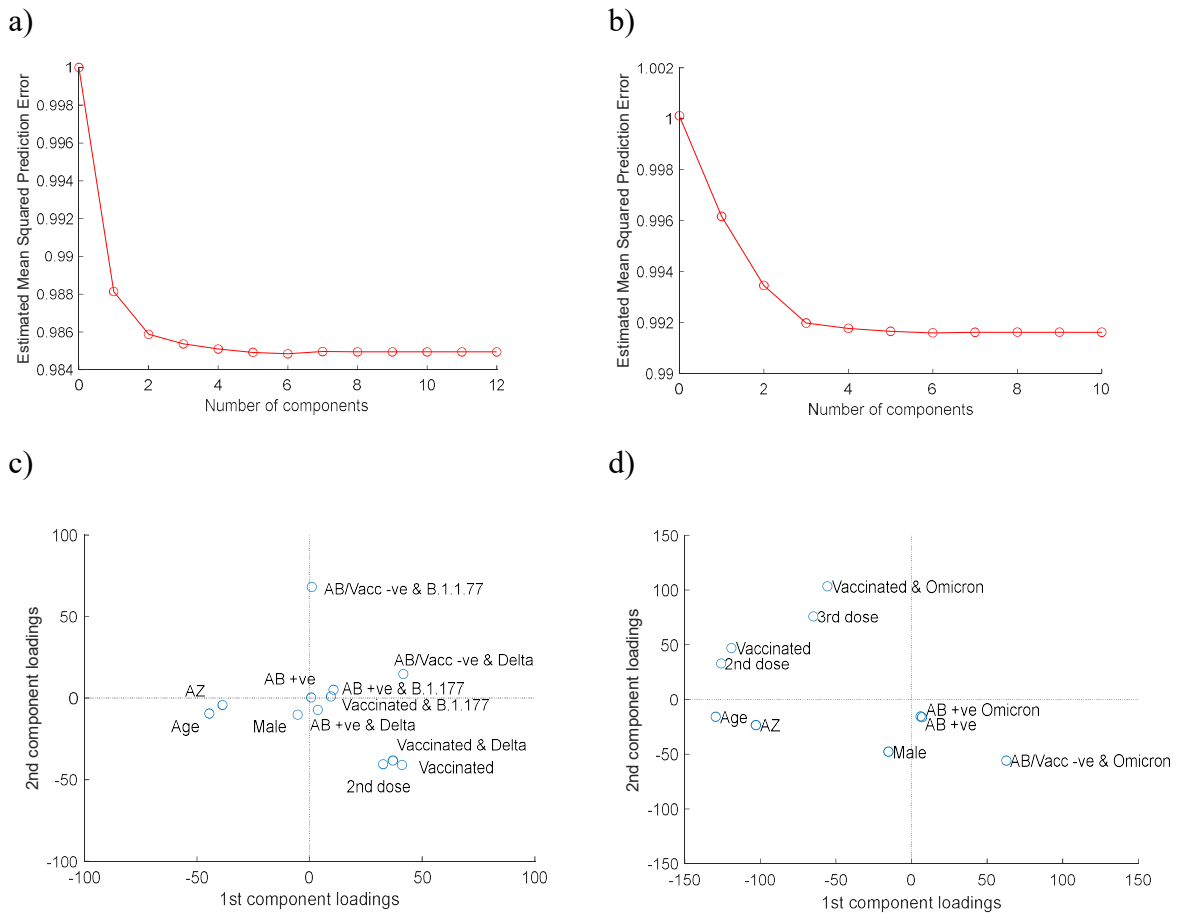

1271

1272 **Supplementary Figure 1. Mean squared error and loading plots relating to the partial least**  
1273 **squares regression analysis.** a) The mean squared error (MSE) plot for the samples sequenced at  
1274 Oxford show that 6 latent components minimise the MSE. b) The mean squared error plot for the  
1275 samples sequenced at Northumbria show that 6 latent components minimise the MSE. c) The loading  
1276 plot relating to the first two latent components for the samples sequenced at Oxford show that age,  
1277 vaccine product, vaccination status and variant (Delta vs Alpha) amongst vaccinated and unvaccinated  
1278 individuals most strongly to the first component; and that variant (B.1.177 vs Alpha) amongst  
1279 individuals with no known prior exposure contributes most strongly to the second component. d) The  
1280 loading plot relating to the first two latent components for the samples sequenced at Northumbria  
1281 show that age, vaccination status and vaccine product contribute most strongly to the first component;  
1282 and variant (BA.1 Omicron vs Delta) amongst vaccinated individuals contributes most strongly to the  
1283 second component.

1284
